# Supplementary material for: Human Interleukin-34 facilitates microglia-like cell differentiation and persistent HIV-1 infection in humanized mice
Source: PubMed Central journal article supplement (PMC6399898; doi:10.1186/s13024-019-0311-y), 2019-03-05
Supplement: 13024_2019_311_MOESM1_ESM.pdf [file 13024_2019_311_MOESM1_ESM.pdf]

### A Integration site

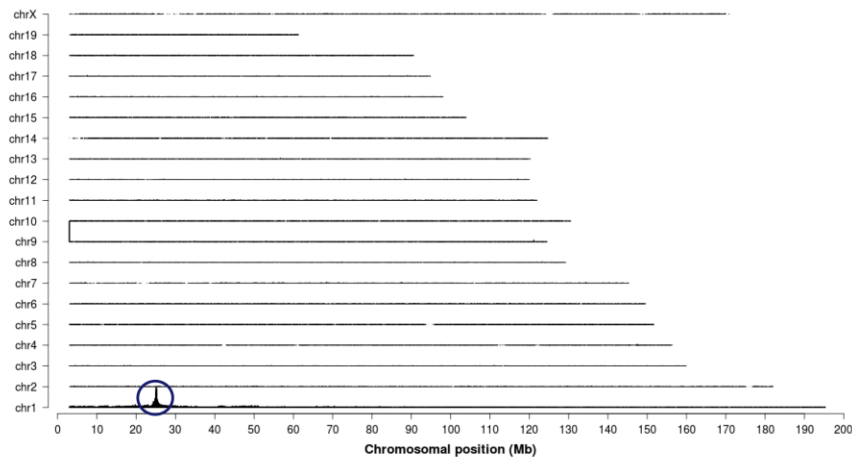

### B Locus-wide coverage

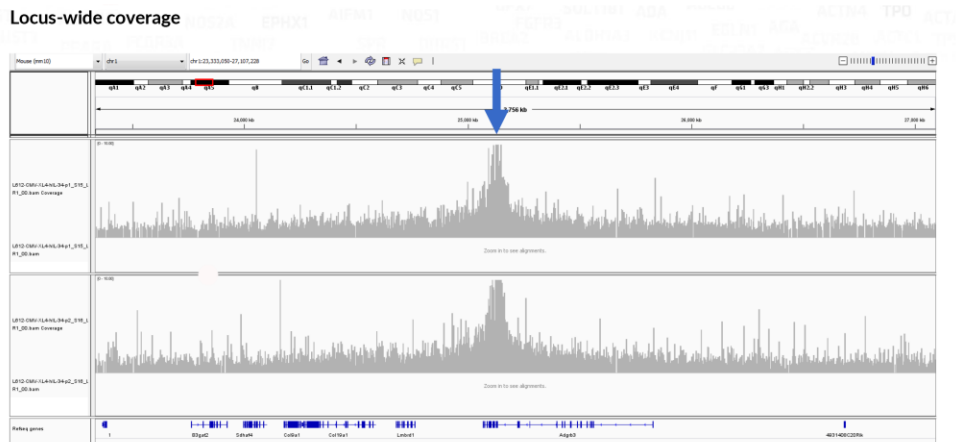

### C

5' integration site:

chr1:25,127,822 (tail) fused to TG:6,459 (tail) with one inserted base  
TTTTATAAACAGACAGACAGAAACACTAGTATACTCAGTTACCAATATATGTGCATTTATTTAAAGATCAACTCAAG  
ACTTGGTATGCTTTTGACACTCACCACTCACAGAAAAGCATCTTACGGATGCCATGACAGTAAGAGAATTATGC

3' integration site:

TG:6,459 (tail) fused to chr1:25,127,823 (head) with one inserted base  
CATGCCATCCGTAAGATGCTTTTCTGTGACTGGTGAGTCTTTATAAACTCGAAAGTAGAAACCATAGTATCTGTAAAT  
GCCAATAAGGTGTTTTACAAAACCTTG

**Figure S1: Integrated site of the transgene in NOG mouse genome. (a)** The transgene has integrated in mouse chromosome 1 (chr1) and the chromosome position is indicated on the x axis. No structural rearrangements were found in the host genome around the integration site. **(b)** TLA sequence coverage across the transgene integration locus; mouse chr1:23,333,050-27,107,228. Sequence coverage (in grey) generated with primer set 1 (top) and primer set 2 (bottom). The blue arrow points toward the breakpoint sequences identified with both primer sets. Y-axis is limited to 10x. **(c)** Breakpoint sequences/reads identified marking the transgene integration. The coverage profile shows that no genomic rearrangements have occurred in the region of the integration site. Transgene has integrated in mouse chr1:25,127,822-25,127,823. According to the refseq integration of gene is in the intronic region of *Adgrb3*.

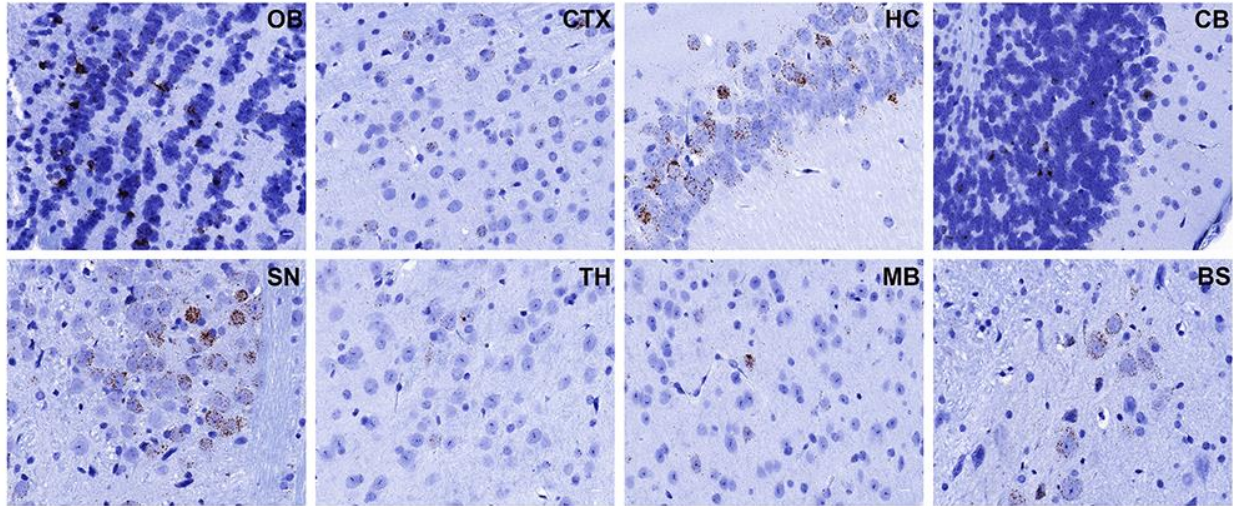

**Figure S2: Human IL-34 expression in different regions of mouse brain.** RNAScope® assay for detecting human IL-34 RNA revealed single brown dots or cluster of dots in 5  $\mu\text{m}$  thick brain sections using antisense probe Hs-IL34-NoXMm targeting 38-1774 base pair of human IL-34. NOG mice showed no signals corresponding to the presence of human IL-34. Images are 40x magnification (scale bar- 10  $\mu\text{m}$ ). Analysis was carried out in a minimum of 4 samples and representative images from one mouse brain are displayed.

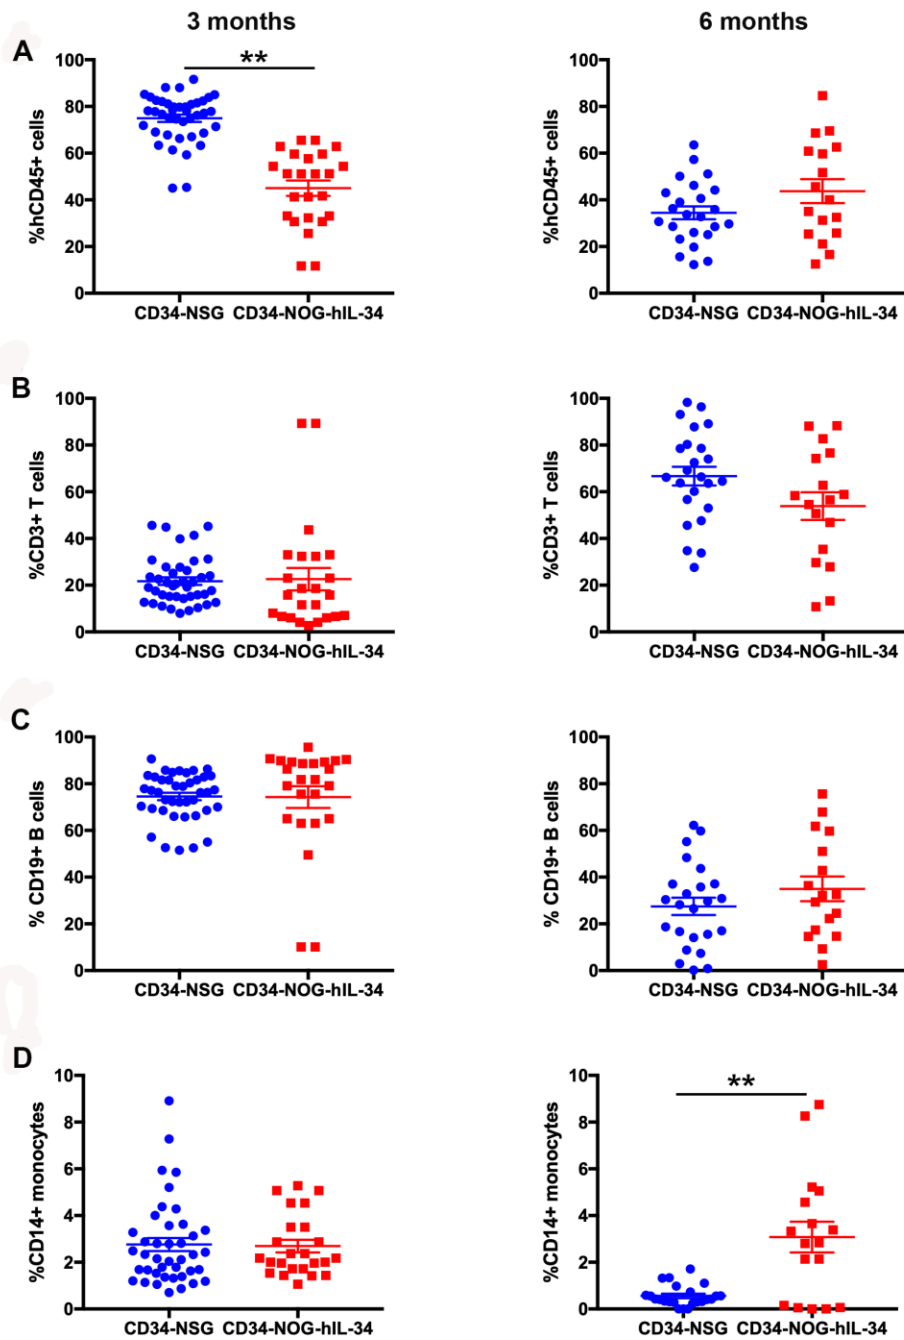

**Figure S3: Comparison of human immune cell reconstitution in NSG and NSG-hIL-34 mice.** Mice were transplanted at birth with HSPC. Flow cytometry analysis of peripheral blood at 3 months (right) and 6 months (left) post transplantation. **a,b,c,d**, are plots showing the percentages of human CD45, CD3, CD19 and CD14 positive cells, respectively. CD3, CD19 and CD14 positive cells from human CD45<sup>+</sup> gate. Each symbol represents an individual mouse. \*\* $p < 0.001$

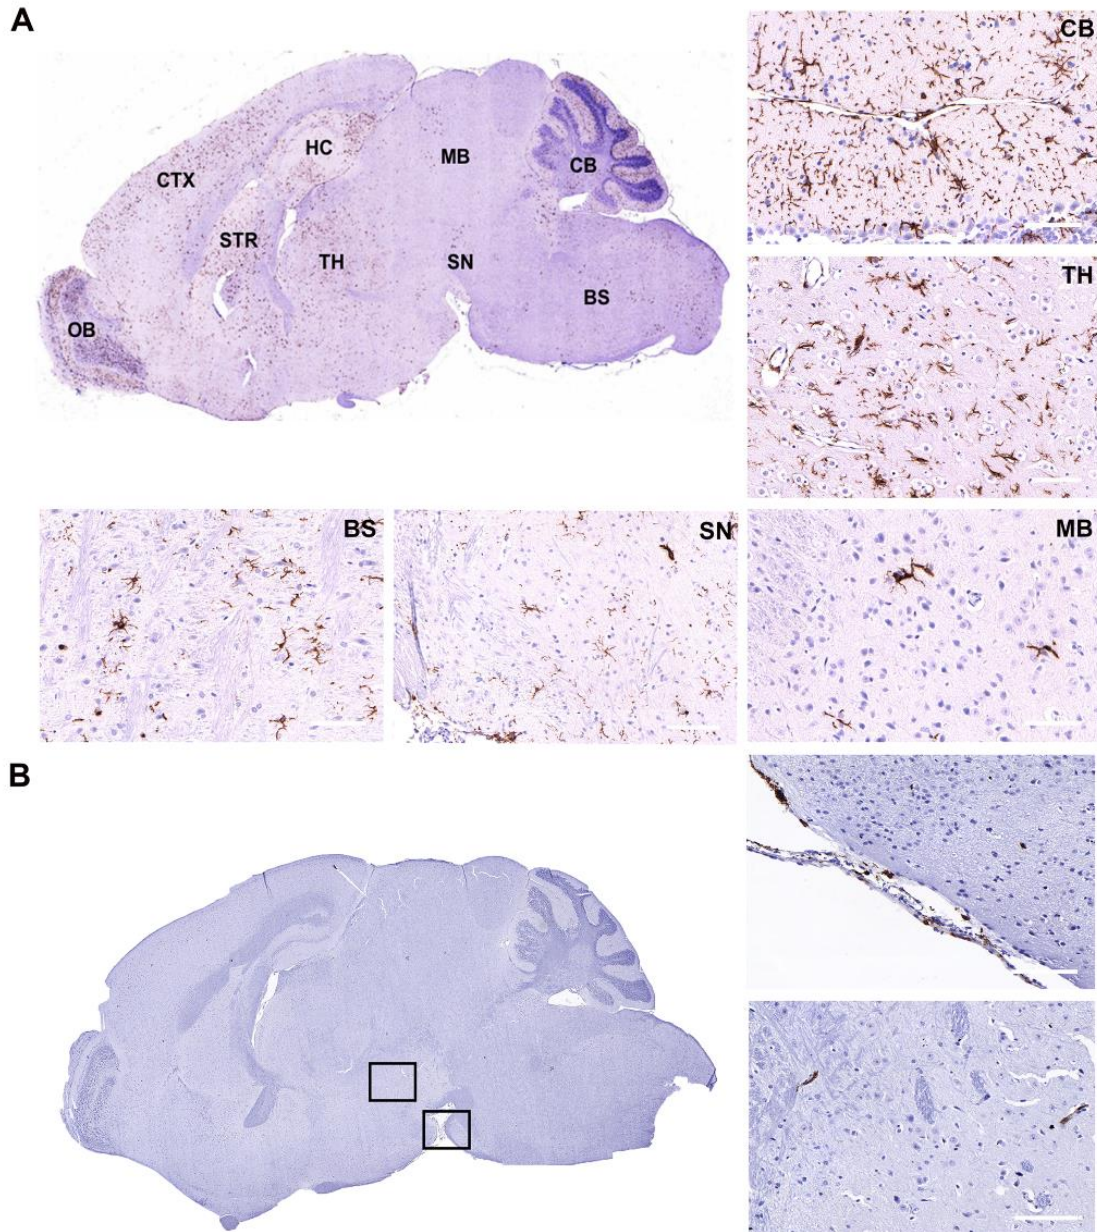

**Figure S4: Human microglial reconstitution in mouse brain.** 5  $\mu\text{m}$  thick paraffin embedded brain sections were stained for human MHC class II (HLA-DR). **(a)** Representative CD34-NOG-hIL-34 mouse brain section is shown at 2x magnification to give an overall view of human microglial distribution throughout the brain regions: olfactory bulb (OB), cerebral cortex (CTX), hippocampus, midbrain (MB), cerebellum (CB), striatum (STR), hippocampus (HC), substantia nigra (SN), thalamus (TH) and brain stem (BS) regions, captured by a VENTANA iScan HT at an original magnification

of 200x. Magnified views (20x objective) of brain regions (OB, CTX and HC are shown in Figure 2B) showing HLADR+ cells with microglial morphology. **(b)** Representative CD34-NSG mouse brain section (2x) demonstrating lack of human microglial cells. HLA DR+ cells in perivascular (top) and meningeal (bottom) areas (boxed) are shown at magnified views (20x), Scale bar-20  $\mu$ m.

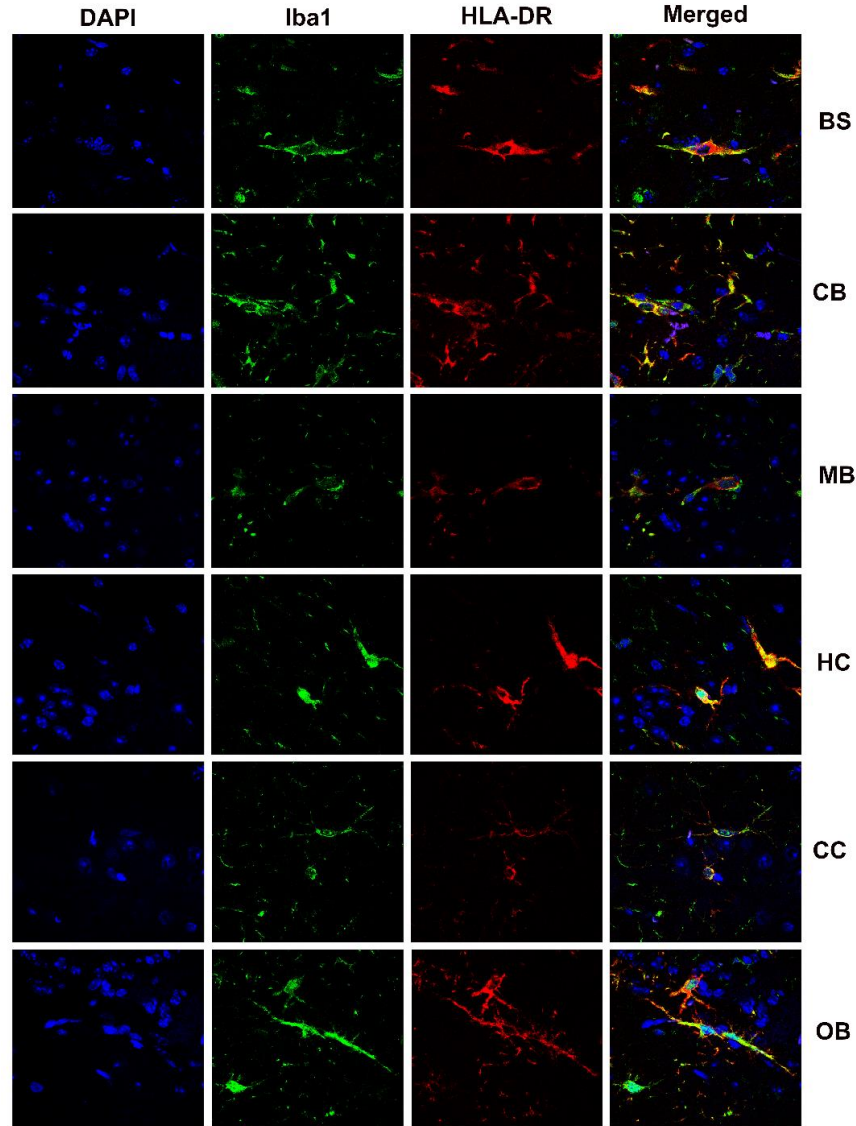

**Figure S5: Human and mouse glial cell distribution in mouse brain.** Sagittal section of paraffin-embedded brain tissue stained for human MHC class II (HLA-DR, red) and microglial cells (Iba1, green). Cells are identified as HLA-DR/Iba1 double positive human microglia and Iba1 single positive mouse microglia. Original confocal images were collected by a Zeiss 710 system at 630x magnification. Images from one brain sample are shown. For quantification of the number of human microglial cells, a minimum of 2-4 selected field of views of the same brain region under 400x magnification were counted for HLA-DR+/Iba1+(human microglia) and Iba1+ (mouse microglia) using Nuance Multispectral Tissue Imaging system (CRi, Woburn, MA), and shown as percentage human microglia from total Iba1+ cells in Figure 2F.

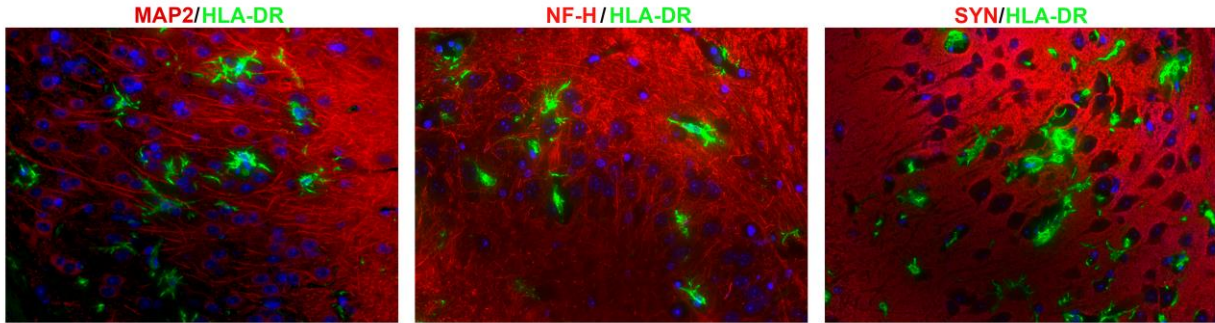

**Figure S6: Mouse neuronal cell interaction with human microglial cells.** Sagittal section of paraffin-embedded brain tissue stained for human MHC class II (HLA-DR, green) and mouse neuronal markers MAP-2, neurofilament H (NF-H) or synaptophysin (SYN) (green). Human microglial cells were not indicating phagocytic phenotype in response to foreign species environs. Original magnification 400x; Representative pictures from n=4 stained for the neuronal markers.

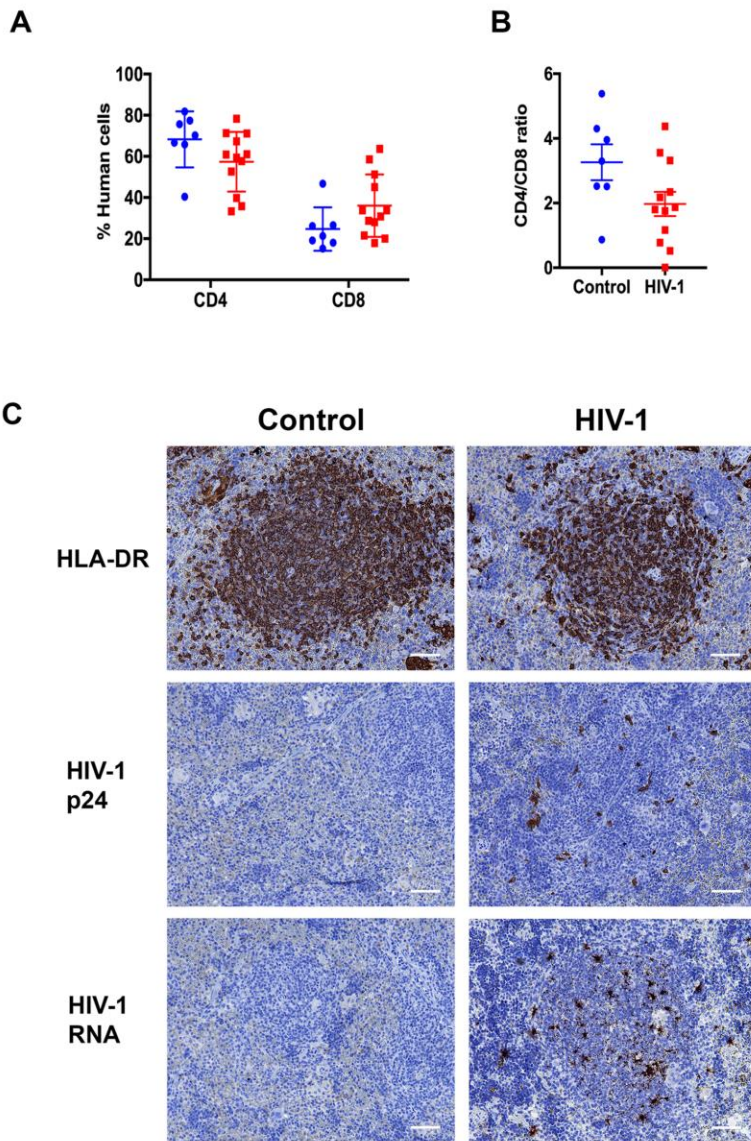

**Figure S7: Establishment of systemic HIV infection in CD34-NOG-hIL-34 mice., (a,b)** Flowcytometric analysis of splenocytes for human CD4 and CD8 positive T lymphocytes. Percent positive cells are shown in **a** and CD4/CD8 ratio in **b**, for HIV+ (n=12, red) and the control (n=7, blue) groups. At 6 weeks post infection, splenic CD4+ T lymphocyte population was not decreased significantly with HIV-1 infection. **(c)** Immunohistology of spleen sections show HLA-DR+ cells (brown) and the presence of HIV-1-infected cells (HIV-1 p24+, brown). RNAScope® assay for detecting HIV-1 RNA revealed single brown dots or cluster of dots in 5µm thick spleen sections. Uninfected mice showed no signals corresponding to the absence of viral RNA. Images were captured by a Nuance multiplex system at an original magnification of 200x, Scale bar -20 µm.



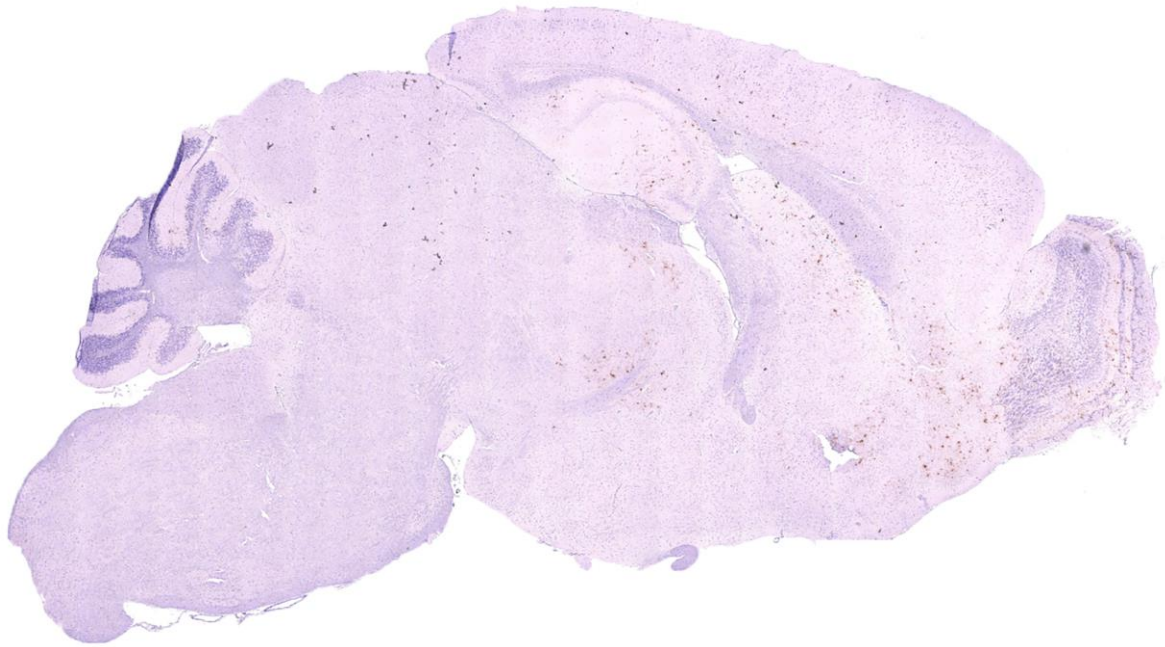

**Figure S8: HIV-1 infection in mouse brain.** Representative CD34-NOG-hIL-34 mouse brain section stained for HIV-1p24 (brown) is shown at 2x magnification to give an overall view of HIV-1 infection throughout the mouse brain. Image was captured by a VENTANA iScan HT at an original magnification of 400x. Infection was highest in OB, CTX, and HC.

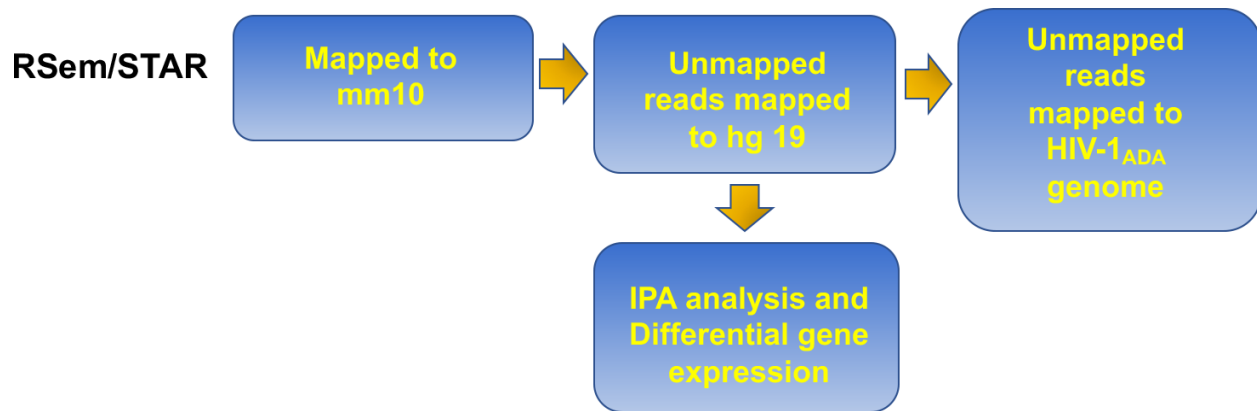

**Figure S9: Flowchart of deep sequencing analysis.** The reads were aligned with STAR-2.5.3a and quantified by RSEM 1.2.21 to mouse reference genome, GRCm38.p3, with default parameters, using Ensemble annotations. The unmapped reads for CD34- NOG-hIL-34 samples were further aligned to human reference genome, GrCh37 using the same pipeline and comparison analysis was performed between uninfected and HIV-1 infected samples. The reads that didn't align to human were further aligned to the HIV-1<sub>ADA</sub> genome. The gene and transcript abundance were measured as Transcripts Per Kilobase Million (TPM) values. Data were filtered to include only protein coding genes. This filtered subset of genes was then used to examine the differential expression of various genes in the R statistical software environment with packages from Bioconductor and identify pathways using Ingenuity pathway analysis.

**Supplemental table 1**

Plasma viral loads of HIV-1 infected humanized NSG mice.

|         | <b>Mouse numbers</b> | <b>HIV-1 RNA copies/ ml</b> |
|---------|----------------------|-----------------------------|
| 6 weeks | 3475                 | 810600                      |
|         | 3476                 | 333900                      |
|         | 3478                 | 190680                      |
|         | 3479                 | 310800                      |
|         | 3473                 | 703500                      |
|         | 3485                 | 378000                      |
| 3 weeks | 3463                 | <20                         |
|         | 3464                 | 2184                        |
|         | 3474                 | 1646                        |
|         | 3471                 | 8841                        |
|         | 3469                 | 220500                      |
|         | 3467                 | <20                         |

**Supplemental Table 2 . List of genes expressed by microglia**

| Gene     | TPM        | Log2<br>(TPM) |
|----------|------------|---------------|
| B2M      | 17240.7025 | 14.0735309    |
| MT-CO1   | 11927.96   | 13.5420597    |
| MT-CO2   | 11092.525  | 13.4373002    |
| HLA-DRB1 | 5978.9075  | 12.5456662    |
| APOE     | 4766.6875  | 12.2187713    |
| C1QA     | 2387.045   | 11.22101      |
| TYROBP   | 2290.3425  | 11.1613476    |
| CTSD     | 2085.585   | 11.0262364    |
| FCGR3A   | 1955.7825  | 10.9335302    |
| STAB1    | 1723.205   | 10.7508786    |
| AIF1     | 1613.7525  | 10.6562036    |
| CD14     | 1081.4125  | 10.0787012    |
| CSF1R    | 1034.5725  | 10.014819     |
| CD68     | 963.7575   | 9.91252637    |
| GRN      | 930.5725   | 9.86197474    |
| CX3CR1   | 900.0075   | 9.81379321    |
| IGHM     | 862.4175   | 9.75224264    |
| CTSH     | 755.695    | 9.56166027    |
| TREM2    | 747.2575   | 9.54546166    |
| ITGB2    | 723.2775   | 9.49840546    |
| RGS10    | 706.555    | 9.46465806    |
| SLCO2B1  | 677.38     | 9.40382158    |
| ALOX5AP  | 606.6725   | 9.24477411    |
| TNFAIP2  | 536.9825   | 9.06873126    |
| P2RY12   | 526.465    | 9.04019381    |
| S100A9   | 474.6525   | 8.89072787    |
| OLFML3   | 441.1      | 8.78496195    |
| CALR     | 435.9675   | 8.76807678    |
| ITGAX    | 422.0725   | 8.72134702    |
| ISG15    | 389.355    | 8.60494234    |
| CD37     | 385.3125   | 8.58988518    |
| CYBB     | 383.24     | 8.58210434    |
| SPI1     | 348.0175   | 8.44301604    |
| FCGR2A   | 291.7375   | 8.18852703    |
| NCF4     | 284.915    | 8.15438777    |
| FUS      | 275.245    | 8.10457255    |
| CXCL10   | 272.61     | 8.09069467    |
| GAS6     | 259.35     | 8.01875656    |
| OLR1     | 259.15     | 8.01764358    |
| LAIR1    | 256.285    | 8.00160523    |
| CD163    | 255.3425   | 7.99628987    |
| TSP0     | 245.8775   | 7.94179591    |

|          |          |            |
|----------|----------|------------|
| GPR34    | 234.75   | 7.87498135 |
| HEXB     | 233.1925 | 7.86537758 |
| MX1      | 232.575  | 7.86155222 |
| MERTK    | 228.3775 | 7.83527671 |
| TMEM173  | 227.92   | 7.83238372 |
| CASP4    | 212.845  | 7.73365939 |
| CCL2     | 201.3475 | 7.65354375 |
| GAL3ST4  | 195.725  | 7.61268423 |
| IL18     | 194.38   | 7.60273598 |
| BHLHE41  | 193.9175 | 7.59929919 |
| SLC2A5   | 193.68   | 7.59753117 |
| IRF8     | 182.91   | 7.51499014 |
| CPVL     | 179.2625 | 7.48592991 |
| HCK      | 176.9875 | 7.46750366 |
| ITGAL    | 171.3725 | 7.42099181 |
| ANXA11   | 168.15   | 7.39360497 |
| P2RY13   | 161.0875 | 7.33170074 |
| ITGAM    | 154.3525 | 7.27008504 |
| PILRA    | 150.885  | 7.23730558 |
| TMEM119  | 148.245  | 7.21183964 |
| BLNK     | 142.8825 | 7.15868542 |
| TNFRSF1B | 135.825  | 7.08560524 |
| HAVCR2   | 134.61   | 7.07264178 |
| PTAFR    | 134.5925 | 7.07245421 |
| FPR1     | 133.11   | 7.05647515 |
| ATP6VOA1 | 132.21   | 7.04668749 |
| GBP2     | 131.925  | 7.04357417 |
| TGFBR1   | 131.4275 | 7.03812337 |
| ACP5     | 131.0275 | 7.03372583 |
| SLC11A1  | 129.4425 | 7.01616757 |
| SOD1     | 128.7525 | 7.00845664 |
| EBI3     | 128.75   | 7.00842862 |
| PTGS1    | 127.04   | 6.98913901 |
| PTOV1    | 125.205  | 6.96814837 |
| TLR2     | 117.9125 | 6.88157286 |
| PTPRC    | 116.335  | 6.86214139 |
| PFKFB3   | 112.3975 | 6.81246614 |
| MMP14    | 111.02   | 6.79467579 |
| CCND1    | 108.9075 | 6.7669595  |
| DOK3     | 106.0925 | 6.72917886 |
| NFKBIA   | 99.81    | 6.64111246 |
| IL10RA   | 98.44    | 6.62117275 |
| RAB3IL1  | 98.055   | 6.61551929 |
| SSBP1    | 97.6925  | 6.6101759  |
| ITGB5    | 96.5875  | 6.59376459 |

|         |         |            |
|---------|---------|------------|
| SLA     | 94.455  | 6.56155526 |
| CD86    | 85.8425 | 6.42362019 |
| PFDN1   | 84.91   | 6.40786257 |
| IL1B    | 84.065  | 6.39343336 |
| PTGES2  | 82.8225 | 6.37195085 |
| BCL2L1  | 80.74   | 6.33521168 |
| ENTPD1  | 80.0475 | 6.32278444 |
| CD40    | 79.7175 | 6.31682456 |
| CD33    | 77.4675 | 6.27551928 |
| MX2     | 77.445  | 6.27510019 |
| IFIT1   | 76.23   | 6.25228697 |
| TIMP1   | 76.0125 | 6.24816478 |
| PIK3AP1 | 75.8725 | 6.24550517 |
| CFB     | 75.225  | 6.2331403  |
| GBP3    | 75.205  | 6.23275668 |
| ETV5    | 74.4575 | 6.21834527 |
| VCP     | 73.4475 | 6.19864148 |
| GBP5    | 72.7575 | 6.18502407 |
| VPS13C  | 68.7675 | 6.10365499 |
| PPARD   | 65.8475 | 6.04105676 |
| ACSL1   | 65.5675 | 6.03490898 |
| IFIT3   | 63.87   | 5.99706655 |
| IGFBP4  | 60.8375 | 5.92688896 |
| PLAUR   | 60.29   | 5.91384682 |
| PPFIBP2 | 59.7    | 5.89965903 |
| CEBPB   | 59.1525 | 5.88636724 |
| PABPN1  | 57.535  | 5.84636795 |
| PTPN7   | 57.0725 | 5.83472386 |
| SLAMF7  | 55.8325 | 5.80303325 |
| DKC1    | 55.4    | 5.79181407 |
| PLAU    | 54.55   | 5.76950729 |
| AGTRAP  | 54.4375 | 5.76652891 |
| TLR1    | 53.77   | 5.74872957 |
| ABCC5   | 52.8425 | 5.72362682 |
| MSRA    | 52.185  | 5.70556327 |
| GPR84   | 50.4775 | 5.65756855 |
| TARDBP  | 49.1525 | 5.61919289 |
| POLA2   | 49.1175 | 5.61816523 |
| CAMK1   | 48.56   | 5.60169652 |
| AGPAT1  | 48.325  | 5.59469783 |
| SPN     | 47.8275 | 5.57976848 |
| RCBTB2  | 47.1175 | 5.55819109 |
| SLC7A8  | 46.82   | 5.54905303 |
| RILPL2  | 46.1825 | 5.52927437 |
| ENPP2   | 45.835  | 5.51837777 |

|          |         |            |
|----------|---------|------------|
| PIM1     | 45.4575 | 5.50644644 |
| APBB3    | 45.0175 | 5.49241404 |
| EML1     | 44.26   | 5.46793155 |
| NLRP3    | 43.3325 | 5.43737757 |
| IVNS1ABP | 41.5575 | 5.37703696 |
| CCR5     | 41.1875 | 5.36413466 |
| FZR1     | 39.9925 | 5.32165756 |
| MTSS1    | 39.745  | 5.31270147 |
| RUNX3    | 39.235  | 5.2940693  |
| PSTPIP2  | 38.9475 | 5.28345882 |
| RASGRP3  | 38.945  | 5.28336621 |
| RSAD2    | 36.235  | 5.17931199 |
| SLC31A2  | 35.5    | 5.14974712 |
| SESN1    | 35.4625 | 5.14822234 |
| PROCR    | 35.3175 | 5.14231132 |
| ANG      | 35.2025 | 5.13760598 |
| ARHGEF7  | 35.2025 | 5.13760598 |
| IFIT2    | 34.7825 | 5.12028973 |
| CCL8     | 33.2775 | 5.05647515 |
| NPEPPS   | 32.49   | 5.02192384 |
| MMP9     | 32.125  | 5.00562455 |
| ABCA7    | 31.3925 | 4.97234802 |
| LAG3     | 31.29   | 4.96762975 |
| APP      | 31.0925 | 4.95849472 |
| UBE2E2   | 30.8825 | 4.94871764 |
| SLC37A2  | 30.54   | 4.93262816 |
| IL10     | 28.63   | 4.83945577 |
| DNAJC9   | 28.5775 | 4.83680781 |
| MCM3     | 28.325  | 4.82400405 |
| HK3      | 28.2775 | 4.82158267 |
| RUNX1    | 27.4    | 4.77610399 |
| ARHGAP18 | 27.065  | 4.75835648 |
| BATF     | 27.0175 | 4.75582228 |
| CRYBB1   | 26.7625 | 4.74214099 |
| RAPGEF2  | 25.5175 | 4.67341509 |
| IGF1     | 25.4775 | 4.67115181 |
| UPP1     | 25.0775 | 4.64832163 |
| F13A1    | 24.7325 | 4.62833617 |
| JAK2     | 24.6875 | 4.62570884 |
| ZDHHC14  | 24.3075 | 4.60332962 |
| GPD2     | 24.2825 | 4.60184506 |
| GADD45B  | 23.7875 | 4.57213175 |
| AGER     | 23.7425 | 4.56939995 |
| ADRB2    | 22.8375 | 4.51333282 |
| CD69     | 22.815  | 4.51191075 |

|           |         |            |
|-----------|---------|------------|
| TNF       | 22.81   | 4.51159454 |
| GCH1      | 22.705  | 4.50493813 |
| MCM4      | 22.3825 | 4.48429928 |
| CCRL2     | 22.1975 | 4.4723253  |
| SUOX      | 21.75   | 4.4429435  |
| PDGFC     | 21.71   | 4.44028782 |
| CCL20     | 21.035  | 4.39471991 |
| CD274     | 20.58   | 4.36317108 |
| SPINT1    | 20.3675 | 4.348197   |
| CREM      | 20.2    | 4.33628339 |
| CD180     | 19.4075 | 4.27854238 |
| PROS1     | 18.995  | 4.24754781 |
| TRAF1     | 18.885  | 4.23916888 |
| GYS1      | 17.935  | 4.16470584 |
| PMEPA1    | 17.57   | 4.13504229 |
| AKAP10    | 17.45   | 4.12515513 |
| SMAD7     | 17.3775 | 4.11914864 |
| SNAPC2    | 17.1475 | 4.09992635 |
| F11R      | 17.045  | 4.09127669 |
| NAMPT     | 16.79   | 4.06953033 |
| IL1RN     | 16.7425 | 4.06544306 |
| PRIM1     | 16.6475 | 4.05723364 |
| NFKBIZ    | 15.5275 | 3.95675366 |
| PHYH      | 15.455  | 3.95000175 |
| LRRK2     | 15.4125 | 3.94602899 |
| MCM6      | 14.7175 | 3.87946072 |
| FAM102B   | 14.24   | 3.83187724 |
| CABLES1   | 13.75   | 3.78135971 |
| PDE4B     | 13.515  | 3.75648961 |
| ARAP2     | 13.425  | 3.74685018 |
| RBL1      | 13.075  | 3.70873904 |
| CASP9     | 13      | 3.70043972 |
| IL1A      | 12.9025 | 3.68957873 |
| SLC6A12   | 12.57   | 3.65191274 |
| BIRC3     | 12.54   | 3.64846544 |
| EPAS1     | 12.215  | 3.61058196 |
| IRAK3     | 11.9725 | 3.58165253 |
| GK        | 11.94   | 3.57773093 |
| RGS2      | 11.855  | 3.56742376 |
| CABLES2   | 11.5975 | 3.53574194 |
| CSF1      | 11.1675 | 3.48123435 |
| CYSLTR1   | 10.9875 | 3.45779126 |
| RAB11FIP1 | 10.675  | 3.41616416 |
| MALT1     | 10.6125 | 3.40769265 |
| FGD4      | 10.28   | 3.36176836 |



|           |        |            |
|-----------|--------|------------|
| SDC2      | 10.15  | 3.34340782 |
| NFRKB     | 9.51   | 3.24944534 |
| DUSP16    | 9.3425 | 3.22380866 |
| FN1       | 9.28   | 3.21412481 |
| FCGR2B    | 9.12   | 3.18903382 |
| GCNT1     | 8.1525 | 3.02724254 |
| FLNB      | 7.89   | 2.9800253  |
| SLC36A1   | 7.7825 | 2.96023367 |
| TMEM154   | 7.285  | 2.86492897 |
| CD80      | 6.7825 | 2.76181714 |
| LAMP3     | 6.5525 | 2.71204545 |
| TGM2      | 5.7175 | 2.51538446 |
| HELLS     | 5.54   | 2.46988598 |
| TET2      | 4.82   | 2.26903315 |
| CD300E    | 4.64   | 2.21412481 |
| CXCL8/IL8 | 4.4525 | 2.15461561 |
| ENC1      | 4.3725 | 2.12845838 |
| ZBED4     | 4.09   | 2.03210084 |
| RMI1      | 3.7975 | 1.92504996 |
| BNIP3     | 3.4675 | 1.79389588 |
| MSH2      | 3.3725 | 1.75381844 |
| CCR2      | 3.285  | 1.71589337 |
| WDHD1     | 2.8275 | 1.49952702 |
| POLA1     | 2.8025 | 1.48671437 |
| ZC3H12C   | 2.62   | 1.38956681 |
| XYLT1     | 2.5    | 1.32192809 |
| IFT57     | 2.3225 | 1.2156786  |
| SOCS3     | 2.1875 | 1.12928302 |
| GOLM1     | 2.0575 | 1.04089243 |
| IRF4      | 1.765  | 0.81966818 |
| EXT1      | 1.675  | 0.7441611  |
| DCBLD2    | 1.55   | 0.63226822 |
| DKK1      | 1.4425 | 0.52857132 |
| HGF       | 1.415  | 0.50080205 |
| HGF/IL6   | 1.415  | 0.50080205 |
| OPHN1     | 0.87   | -0.2009127 |
| ABCD2     | 0.5925 | -0.7551129 |
| SLC7A11   | 0.4425 | -1.1762506 |
| DGKH      | 0.4375 | -1.1926451 |

**Supplemental table 3. HIV induced transcriptional changes evaluated at 8 months of age (hg19)- Upregulation.**

| Gene       | Expression levels, TPM |            | Fold change | Log2 fold change | p-value    |
|------------|------------------------|------------|-------------|------------------|------------|
|            | HIV+                   | Uninfected |             |                  |            |
| FXVD6      | 54.8975                | 3.405      | 16.1226138  | 4.011013748      | 0.01722811 |
| C5orf42    | 40.5775                | 2.6725     | 15.18334892 | 3.92441813       | 0.03719037 |
| CD300E     | 53.1875                | 4.64       | 11.46282328 | 3.518890516      | 0.02153112 |
| SLC12A8    | 19.825                 | 2.11       | 9.395734597 | 3.232005962      | 0.04076518 |
| MCM3AP-AS1 | 32.53                  | 3.6325     | 8.955264969 | 3.162736119      | 0.02019113 |
| GALK2      | 37.57                  | 5.4175     | 6.934933087 | 2.793881963      | 0.0272533  |
| PTER       | 17.4325                | 2.6575     | 6.559736595 | 2.713637885      | 0.00134467 |
| AC129507.1 | 44.8825                | 6.935      | 6.471881759 | 2.69418525       | 0.0017951  |
| HELZ2      | 99.1625                | 16.305     | 6.081723398 | 2.604480203      | 8.44E-05   |
| AC006027.1 | 68.2025                | 11.475     | 5.943572985 | 2.571330469      | 0.04293953 |
| ACTA2      | 20.54                  | 3.545      | 5.794076164 | 2.534578649      | 0.0038944  |
| USP18      | 68.395                 | 11.8975    | 5.748686699 | 2.523232407      | 0.00101022 |
| IFIT1      | 431.19                 | 76.23      | 5.656434475 | 2.499892939      | 7.98E-05   |
| CDKN1A     | 167.785                | 29.93      | 5.605913799 | 2.48694956       | 0.04659772 |
| CNTNAP2    | 11.515                 | 2.125      | 5.418823529 | 2.437979665      | 0.00061455 |
| TTC7B      | 77.52                  | 14.69      | 5.277059224 | 2.399734175      | 0.02682365 |
| HECTD4     | 34.5175                | 6.915      | 4.991684743 | 2.319526822      | 0.00530285 |
| AL391058.1 | 117.1275               | 24.01      | 4.878279883 | 2.286372533      | 0.04205697 |
| IFI6       | 1823.0875              | 379.2325   | 4.807308182 | 2.265229293      | 0.00017223 |
| XIST       | 349.7375               | 73.0525    | 4.787481606 | 2.259266944      | 0.04912241 |
| IFIT3      | 304.185                | 63.87      | 4.762564584 | 2.251738657      | 0.0002568  |
| TXNDC5     | 102.7075               | 21.635     | 4.747284493 | 2.247102509      | 0.04562334 |
| ZNF683     | 38.4625                | 8.345      | 4.609047334 | 2.204468584      | 0.00932802 |
| GMPR       | 60.68                  | 13.295     | 4.56412185  | 2.190337308      | 0.03146741 |
| NEDD4L     | 40.755                 | 9.0575     | 4.499585978 | 2.16979226       | 0.041285   |
| MBTPS2     | 9.5375                 | 2.1625     | 4.410404624 | 2.140911019      | 0.00117558 |
| IFITM1     | 526.96                 | 120.435    | 4.375472246 | 2.129438736      | 0.02522596 |
| AC015911.7 | 28.085                 | 6.435      | 4.364413364 | 2.125787749      | 0.01623068 |
| ASGR2      | 33.8225                | 7.8        | 4.336217949 | 2.116437272      | 0.01680561 |
| MBNL2      | 6.525                  | 1.5125     | 4.314049587 | 2.109042759      | 0.01595465 |
| TOP3B      | 45.4925                | 10.655     | 4.269591741 | 2.094098126      | 0.00108553 |
| HIST1H2BN  | 152.0225               | 36.095     | 4.211732927 | 2.074413956      | 0.02474996 |
| ISG15      | 1599.2325              | 389.355    | 4.107389144 | 2.038221638      | 0.0008069  |
| RNA5-8SP6  | 8015.5375              | 1966.185   | 4.076695479 | 2.027400194      | 0.00380585 |
| JPX        | 121.735                | 30.275     | 4.020974401 | 2.007545152      | 0.00958542 |
| PSMD14     | 27.26                  | 6.82       | 3.997067449 | 1.998941918      | 0.03796164 |
| IFIT2      | 137.42                 | 34.7825    | 3.950837346 | 1.982158453      | 0.00157318 |

|             |           |           |             |             |            |
|-------------|-----------|-----------|-------------|-------------|------------|
| IFNLR1      | 21.2125   | 5.4325    | 3.904739991 | 1.965226485 | 0.03687949 |
| AC012651.1  | 16.6      | 4.2575    | 3.899001762 | 1.963104807 | 0.00096346 |
| LY6E        | 1062.0225 | 272.7225  | 3.894150648 | 1.961308697 | 0.00035838 |
| HSH2D       | 50.7625   | 13.07     | 3.883894415 | 1.957503981 | 0.02081094 |
| AC093673.1  | 33.305    | 8.6625    | 3.844733045 | 1.94288343  | 0.01337471 |
| PPP5C       | 66.9975   | 17.46     | 3.837199313 | 1.940053704 | 0.02622614 |
| IFIT5       | 35.9425   | 9.4       | 3.823670213 | 1.934958098 | 0.02096718 |
| MAPK12      | 29.0875   | 7.63      | 3.81225426  | 1.930644343 | 0.00697285 |
| CABYR       | 31.535    | 8.2925    | 3.802833886 | 1.927074921 | 0.04899787 |
| SNHG7       | 48.7875   | 12.9125   | 3.778315586 | 1.917743209 | 0.01511909 |
| IFI44L      | 461.0425  | 124.3725  | 3.706948883 | 1.890232221 | 0.03882028 |
| CMPK2       | 115.725   | 31.35     | 3.69138756  | 1.884163214 | 0.00015617 |
| TMEM201     | 14.0775   | 3.8975    | 3.611930725 | 1.852770223 | 0.0452237  |
| VAMP1       | 65.03     | 18.0575   | 3.601273709 | 1.848507253 | 0.03248122 |
| ISG20       | 122.015   | 34.2575   | 3.561701817 | 1.83256674  | 0.02770207 |
| C11orf21    | 34.77     | 9.775     | 3.557033248 | 1.83067446  | 0.02043909 |
| RAB5B       | 32.905    | 9.2575    | 3.554415339 | 1.829612272 | 0.01606382 |
| OAS3        | 151.3825  | 43.1925   | 3.504833015 | 1.80934571  | 0.00504472 |
| ARMC6       | 59.6675   | 17.04     | 3.50161385  | 1.808019995 | 0.04161771 |
| AC005786.3  | 82.79     | 23.93     | 3.459674049 | 1.790636122 | 0.03545831 |
| OXR1        | 22.4075   | 6.54      | 3.426223242 | 1.776619156 | 0.0336437  |
| IFITM3      | 1689.7025 | 496.675   | 3.402028489 | 1.766395223 | 0.00340145 |
| GNL2        | 125.695   | 37.16     | 3.382534984 | 1.758104855 | 0.02038613 |
| ZNF585B     | 12.4275   | 3.6775    | 3.379333787 | 1.756738857 | 0.01821105 |
| COG4        | 127.4875  | 37.875    | 3.366006601 | 1.751038006 | 0.00480858 |
| UBR5        | 34.325    | 10.36     | 3.313223938 | 1.728235717 | 0.03517541 |
| SPP1        | 11336.925 | 3423.1525 | 3.311837553 | 1.72763191  | 0.02422009 |
| OAS2        | 199.0725  | 60.9475   | 3.266294762 | 1.707654991 | 0.0043873  |
| BAG6        | 258.8875  | 80.215    | 3.227420059 | 1.690381361 | 0.01688595 |
| SCCPDH      | 18.05     | 5.63      | 3.206039076 | 1.68079201  | 0.0317956  |
| NARS2       | 41.665    | 13.1525   | 3.167838814 | 1.66349893  | 0.03820782 |
| GSPT2       | 6.0225    | 1.9125    | 3.149019608 | 1.654902741 | 0.02022108 |
| VMO1        | 125.2875  | 40.02     | 3.130622189 | 1.646449411 | 0.02560827 |
| RSAD2       | 111.875   | 36.235    | 3.087484476 | 1.626431883 | 8.09E-05   |
| HAUS8       | 42.4625   | 13.8025   | 3.076435428 | 1.621259712 | 0.00143259 |
| MX2         | 235.9325  | 77.445    | 3.046452321 | 1.607130161 | 0.01177996 |
| PHKA2       | 49.7325   | 16.405    | 3.031545261 | 1.600053362 | 0.00079965 |
| RAB11FIP1P1 | 10.9675   | 3.6625    | 2.994539249 | 1.582334042 | 0.03401157 |
| STARD5      | 39.2025   | 13.0975   | 2.99312846  | 1.581654198 | 0.01887342 |
| TRIM5       | 60.28     | 20.355    | 2.961434537 | 1.566296195 | 0.04046784 |
| NFATC3      | 9.385     | 3.175     | 2.955905512 | 1.563600153 | 0.03903481 |
| SMARCC1     | 27.2975   | 9.385     | 2.908630794 | 1.54034018  | 0.04051186 |

|            |          |          |             |             |            |
|------------|----------|----------|-------------|-------------|------------|
| AEN        | 29.255   | 10.09    | 2.899405352 | 1.535757044 | 0.03299761 |
| TNFSF14    | 20.45    | 7.0775   | 2.889438361 | 1.530789094 | 0.03593852 |
| KIF17      | 19.83    | 6.8825   | 2.881220487 | 1.526680068 | 0.03257602 |
| SPHK1      | 51.08    | 17.73    | 2.880992668 | 1.526565989 | 0.01386022 |
| HPCAL1     | 42.2275  | 14.8225  | 2.848878394 | 1.510394041 | 0.00916086 |
| AP002982.1 | 921.76   | 323.5625 | 2.848785011 | 1.51034675  | 0.01606452 |
| UCKL1      | 45.7775  | 16.2125  | 2.823592907 | 1.497532102 | 0.01901915 |
| PLBD2      | 19.3025  | 6.8725   | 2.808657694 | 1.489880806 | 0.00195576 |
| FAM98C     | 39.7175  | 14.215   | 2.794055575 | 1.482360717 | 0.03020293 |
| IFIH1      | 41.54    | 15.0075  | 2.767949359 | 1.468817548 | 0.04521309 |
| MX1        | 641.22   | 232.575  | 2.757046114 | 1.463123398 | 0.00376143 |
| HERC6      | 48.565   | 17.735   | 2.738370454 | 1.453317631 | 0.01909818 |
| SIGLEC1    | 369.6875 | 135.2125 | 2.734122215 | 1.451077733 | 0.00438387 |
| CES2       | 70.165   | 25.8675  | 2.712477046 | 1.439610929 | 0.03977778 |
| AC010422.3 | 114.2575 | 42.735   | 2.673628174 | 1.418798841 | 0.01825083 |
| HASPIN     | 6.75     | 2.525    | 2.673267327 | 1.418604114 | 0.04105267 |
| EVA1B      | 45.9675  | 17.385   | 2.644089733 | 1.402771138 | 0.025539   |
| MR1        | 61.5275  | 23.2875  | 2.642082662 | 1.401675605 | 0.02421024 |
| ETV7       | 26.5325  | 10.1     | 2.626980198 | 1.393405326 | 0.01883436 |
| RPAP1      | 37.925   | 14.4725  | 2.620487131 | 1.389835024 | 0.04736428 |
| TIMP1      | 197.84   | 76.0125  | 2.602729814 | 1.380025555 | 0.03483499 |
| HDAC7      | 107.7325 | 41.4425  | 2.599565663 | 1.378270597 | 0.02332255 |
| SELL       | 65.355   | 25.325   | 2.58065153  | 1.367735345 | 0.03120468 |
| NRBP1      | 41.695   | 16.2     | 2.573765432 | 1.363880575 | 0.04472702 |
| EBAG9      | 17.095   | 6.645    | 2.572610986 | 1.363233318 | 0.03196026 |
| IL1RN      | 42.9925  | 16.7425  | 2.567866209 | 1.360570037 | 0.02392997 |
| PRPSAP1    | 68.585   | 26.8125  | 2.557948718 | 1.354987341 | 0.004984   |
| TCF12      | 57.97    | 22.74    | 2.549252419 | 1.350074231 | 0.00231872 |
| BUD23      | 211.6975 | 83.31    | 2.541081503 | 1.345442649 | 0.02824351 |
| COPS6      | 82.8075  | 32.69    | 2.533114102 | 1.340912064 | 0.02329319 |
| SPATS2L    | 169.415  | 67.52    | 2.509108412 | 1.327174807 | 0.00642607 |
| RAB11FIP3  | 34.545   | 13.8075  | 2.501901141 | 1.323024784 | 0.01397924 |
| IFITM2     | 556.315  | 222.6975 | 2.498074743 | 1.320816643 | 0.01588696 |
| ICK        | 7.1725   | 2.885    | 2.486135182 | 1.313904744 | 0.02618431 |
| NEK7       | 16.24    | 6.5925   | 2.463405385 | 1.300654061 | 0.00078794 |
| CAPN7      | 30.7675  | 12.4925  | 2.462877727 | 1.300345005 | 0.00901615 |
| STX5       | 49.6675  | 20.19    | 2.460004953 | 1.29866122  | 0.04731535 |
| EPHB2      | 25.2025  | 10.29    | 2.449222546 | 1.292323869 | 0.038581   |
| OAS1       | 446.7925 | 182.5675 | 2.447272926 | 1.291175004 | 0.01220056 |
| GMPPB      | 22.71    | 9.32     | 2.436695279 | 1.284925846 | 0.02466833 |
| PPWD1      | 53.115   | 21.97    | 2.417614929 | 1.273584475 | 0.04998702 |
| MICU1      | 40.26    | 16.7075  | 2.409696244 | 1.268851298 | 0.02869661 |

|           |           |           |             |             |            |
|-----------|-----------|-----------|-------------|-------------|------------|
| IFI35     | 235.875   | 97.9725   | 2.407563347 | 1.267573758 | 0.02775028 |
| RNF34     | 94.6875   | 39.45     | 2.400190114 | 1.263148683 | 0.00643375 |
| IFI44     | 674.8575  | 284.085   | 2.375547811 | 1.248260243 | 0.00540845 |
| VILL      | 40.895    | 17.4125   | 2.348600144 | 1.231801111 | 0.04817763 |
| HCST      | 526.885   | 225.1175  | 2.340488856 | 1.226809896 | 0.04017428 |
| COASY     | 100.41    | 42.98     | 2.336202885 | 1.224165569 | 0.00789228 |
| SHISA5    | 306.3425  | 131.225   | 2.334482759 | 1.223102934 | 0.00857355 |
| LGALS3BP  | 821.935   | 353.0775  | 2.327916676 | 1.21903942  | 0.00107446 |
| NLRC5     | 211.815   | 91.185    | 2.322914953 | 1.215936335 | 0.03574026 |
| HDLBP     | 266.6225  | 114.78    | 2.322900331 | 1.215927254 | 0.01867685 |
| REEP5     | 80.445    | 34.685    | 2.319302292 | 1.21369087  | 0.0104106  |
| IL34      | 5235.9625 | 2260.5875 | 2.316195458 | 1.211757004 | 0.01385128 |
| HNRNPA3P1 | 107.37    | 46.845    | 2.292026897 | 1.196623974 | 0.01912132 |
| SFXN3     | 96.195    | 41.9975   | 2.290493482 | 1.195658457 | 0.00030336 |
| PLGRKT    | 47.6475   | 20.8675   | 2.28333533  | 1.191142749 | 0.00774333 |
| RRP1      | 42.8425   | 18.7725   | 2.2821947   | 1.190421877 | 0.04019875 |
| QRICH1    | 114.4775  | 50.2525   | 2.278045868 | 1.187796796 | 0.0102212  |
| SUOX      | 49.505    | 21.75     | 2.276091954 | 1.186558844 | 0.04536761 |
| SMAP1     | 21.9775   | 9.675     | 2.271576227 | 1.183693719 | 0.00731976 |
| NR1H2     | 91.3125   | 40.3325   | 2.263993058 | 1.178869534 | 0.00035857 |
| IL1B      | 189.505   | 84.065    | 2.254267531 | 1.172658741 | 0.02812462 |
| RTP4      | 42.27     | 18.9675   | 2.228548834 | 1.156104575 | 0.0412145  |
| MGLL      | 30.35     | 13.7725   | 2.203666727 | 1.139906054 | 0.0398221  |
| RNFT1     | 46.4475   | 21.1825   | 2.192729848 | 1.132728078 | 0.01148532 |
| ACADM     | 79.7775   | 36.395    | 2.191990658 | 1.13224165  | 0.01595399 |
| CH25H     | 85.5175   | 39.0425   | 2.190369469 | 1.131174243 | 0.03769408 |
| TOR1B     | 45.1125   | 20.63     | 2.186742608 | 1.128783417 | 0.03108384 |
| CACTIN    | 30.5275   | 13.965    | 2.186000716 | 1.128293874 | 0.03974614 |
| MTPAP     | 8.92      | 4.1075    | 2.171637249 | 1.118783135 | 0.02360391 |
| SDHA      | 118.5875  | 54.685    | 2.168556277 | 1.116734884 | 0.00577409 |
| ANXA6     | 84.6625   | 39.165    | 2.161687731 | 1.112158132 | 0.0398193  |
| WDR5      | 30.9      | 14.3275   | 2.156691677 | 1.108819942 | 0.02337343 |
| MBOAT1    | 9.8575    | 4.5875    | 2.148773842 | 1.103513647 | 0.02648039 |
| APOBEC3G  | 104.9625  | 48.925    | 2.145375575 | 1.101230232 | 0.00200234 |
| CD151     | 96.75     | 45.16     | 2.14238264  | 1.099216175 | 0.028464   |
| NMI       | 70.14     | 32.86     | 2.134510043 | 1.09390495  | 0.0140442  |
| TNFRSF10B | 101.275   | 47.6775   | 2.124167584 | 1.086897591 | 0.0089161  |
| SERPINH1  | 43.1825   | 20.5275   | 2.103641457 | 1.072888833 | 0.00693881 |
| SYAP1     | 16.52     | 7.8675    | 2.099777566 | 1.070236508 | 0.01266433 |
| FYCO1     | 18.54     | 8.895     | 2.084317032 | 1.059574733 | 0.04269229 |
| SETD5     | 38.3425   | 18.505    | 2.072007566 | 1.051029271 | 0.03549894 |
| TOLLIP    | 67.2775   | 32.5625   | 2.066103647 | 1.046912629 | 0.03275751 |
| MRPL35    | 51.1325   | 24.815    | 2.060548056 | 1.04302811  | 0.02171999 |

|           |          |          |             |             |            |
|-----------|----------|----------|-------------|-------------|------------|
| MAN2A2    | 123.61   | 60.46    | 2.044492226 | 1.031742577 | 0.03344275 |
| NFU1      | 82.7475  | 40.4775  | 2.044283861 | 1.031595537 | 0.0483747  |
| PARP10    | 292.6075 | 143.94   | 2.032843546 | 1.023499185 | 0.00704    |
| SECTM1    | 57.6775  | 28.405   | 2.030540398 | 1.02186373  | 0.04551786 |
| ZNF326    | 25.25    | 12.46    | 2.026484751 | 1.01897932  | 0.01497348 |
| HSPA9     | 133.155  | 65.8075  | 2.023401588 | 1.016782682 | 0.04221055 |
| PML       | 129.9375 | 64.2525  | 2.022294852 | 1.015993359 | 0.00728337 |
| DYNLT1    | 244.61   | 121.2375 | 2.017610063 | 1.012647376 | 0.01484999 |
| TMCO1     | 90.8975  | 45.0875  | 2.016024397 | 1.011513098 | 0.00178524 |
| SLTM      | 183.5175 | 91.0375  | 2.015845119 | 1.011384798 | 0.03624916 |
| HERC5     | 43.0525  | 21.4275  | 2.009217128 | 1.006633478 | 0.0244648  |
| TINF2     | 126.5625 | 63.0525  | 2.007255858 | 1.005224524 | 0.0378379  |
| CCDC127   | 2.895    | 1.4425   | 2.006932409 | 1.004992029 | 0.03921369 |
| PARP12    | 210.2    | 104.8    | 2.005725191 | 1.004123952 | 0.00055625 |
| ATP1B1    | 41.7925  | 20.9675  | 1.993203768 | 0.995089206 | 0.02860235 |
| RNASEH2A  | 43.145   | 21.6725  | 1.990771715 | 0.993327795 | 0.04461548 |
| MBOAT7    | 68.0975  | 34.455   | 1.976418517 | 0.982888477 | 0.04095627 |
| RIPK3     | 78.79    | 40.31    | 1.954601836 | 0.966874752 | 0.00574341 |
| KIAA0319L | 51.955   | 26.585   | 1.954297536 | 0.96665013  | 0.01259776 |
| CCR1      | 166.94   | 85.5425  | 1.951544554 | 0.9646164   | 0.00078514 |
| PAAF1     | 66.9575  | 34.52    | 1.939672654 | 0.955813198 | 0.01450768 |
| MPPE1     | 158.6175 | 82       | 1.934359756 | 0.951856135 | 0.02232493 |
| PLOD3     | 69.8725  | 36.535   | 1.912481182 | 0.935445553 | 0.04664106 |
| ZFR       | 22.1225  | 11.595   | 1.907934455 | 0.93201161  | 0.00242315 |
| TRIM21    | 119.3625 | 62.6475  | 1.905303484 | 0.930020814 | 0.03865759 |
| DCAF8     | 139.415  | 73.295   | 1.90210792  | 0.927599103 | 0.03311806 |
| THOP1     | 73.72    | 38.975   | 1.89146889  | 0.919507048 | 0.01046026 |
| GALK1     | 90.655   | 47.9475  | 1.890713802 | 0.918930998 | 0.02842298 |
| SLC25A19  | 131.48   | 69.955   | 1.87949396  | 0.910344279 | 0.04240096 |
| METTL9    | 66.02    | 35.1475  | 1.878369728 | 0.909481063 | 0.02729067 |
| GDE1      | 71.465   | 38.1     | 1.875721785 | 0.907445857 | 0.00347739 |
| VRK3      | 52.37    | 28.0475  | 1.867189589 | 0.900868422 | 0.04650228 |
| TMEM189   | 33.095   | 17.735   | 1.866084015 | 0.900013941 | 0.00254348 |
| RBM17     | 149.9475 | 80.67    | 1.858776497 | 0.894353308 | 0.01047087 |
| STRADA    | 87.34    | 47       | 1.858297872 | 0.893981774 | 0.03602651 |
| LRP3      | 52       | 28.1925  | 1.84446218  | 0.883200207 | 0.04244487 |
| SLC27A3   | 88.58    | 48.2     | 1.837759336 | 0.877947851 | 0.03497788 |
| CNOT7     | 41.8825  | 22.8025  | 1.836750356 | 0.877155554 | 0.01697915 |
| ANKRD13A  | 68.89    | 37.875   | 1.818877888 | 0.863048689 | 0.01262843 |
| TRAPPC12  | 155.92   | 86.3725  | 1.805204203 | 0.852162042 | 0.01127491 |
| XPNPEP1   | 99.2     | 54.9725  | 1.804538633 | 0.85163003  | 0.04882624 |
| SERF2     | 169.68   | 94.38    | 1.797838525 | 0.846263449 | 0.01420876 |
| TBC1D23   | 14.125   | 8.0025   | 1.765073415 | 0.819728191 | 0.04312028 |

|            |          |           |             |             |            |
|------------|----------|-----------|-------------|-------------|------------|
| CCDC90B    | 48.61    | 27.6325   | 1.759160409 | 0.814887041 | 0.03070393 |
| FDPS       | 122.055  | 69.4975   | 1.756250225 | 0.81249841  | 0.04435234 |
| NT5C3B     | 29.1075  | 16.685    | 1.744531016 | 0.802839247 | 0.03299313 |
| NCF1       | 281.9    | 162.9075  | 1.730429845 | 0.791130453 | 0.04140804 |
| MALT1      | 18.345   | 10.6125   | 1.728621908 | 0.789622351 | 0.01777768 |
| AL583722.2 | 138.0625 | 80.0375   | 1.724972669 | 0.786573504 | 0.00980444 |
| SAMD9      | 29.0025  | 16.8325   | 1.723006089 | 0.7849278   | 0.02430492 |
| MYD88      | 111.9425 | 64.99     | 1.722457301 | 0.78446822  | 0.00466745 |
| APOE       | 8114.485 | 4766.6875 | 1.70233207  | 0.767512488 | 0.00223839 |
| SERPING1   | 324.76   | 193.4375  | 1.67888853  | 0.747506445 | 0.02403163 |
| PEPD       | 160.485  | 95.925    | 1.673025801 | 0.742459695 | 0.02451472 |
| SLC39A13   | 69.275   | 41.775    | 1.65828845  | 0.729694977 | 0.0238834  |
| AP2S1      | 233.1625 | 140.725   | 1.656866228 | 0.728457127 | 0.04021659 |
| ARFRP1     | 54.7825  | 33.21     | 1.64957844  | 0.722097382 | 0.03192148 |
| NBEAL2     | 130.5025 | 79.19     | 1.647966915 | 0.720687279 | 0.02653422 |
| TEX261     | 60.4475  | 36.7725   | 1.643823509 | 0.717055411 | 0.01296086 |
| MLF2       | 177.3    | 108.0425  | 1.641020895 | 0.714593608 | 0.00663493 |
| CPSF2      | 30.0375  | 18.475    | 1.625845737 | 0.701190379 | 0.02911171 |
| BANF1      | 169.285  | 104.295   | 1.623136296 | 0.698784149 | 0.00933547 |
| TMC6       | 220.38   | 135.975   | 1.620739106 | 0.696651876 | 0.03024743 |
| CPSF7      | 73.4075  | 45.7325   | 1.605149511 | 0.682707683 | 0.04974627 |
| BCL10      | 7.635    | 4.805     | 1.588969823 | 0.668091726 | 0.04955636 |
| ABHD3      | 82.85    | 52.3775   | 1.581786072 | 0.661554497 | 0.02077089 |
| RTL8C      | 106.6775 | 67.6625   | 1.57661186  | 0.656827533 | 0.01388373 |
| SELENOI    | 5.125    | 3.255     | 1.574500768 | 0.654894461 | 0.0469405  |
| RRP1B      | 18.125   | 11.5175   | 1.573692208 | 0.654153397 | 0.04888736 |
| PRDX4      | 62.6875  | 40.1375   | 1.561818748 | 0.643227036 | 0.03098512 |
| DNAJB6     | 76.6175  | 49.115    | 1.559961315 | 0.641510253 | 0.0347495  |
| PQBP1      | 145.665  | 93.92     | 1.550947615 | 0.633149959 | 0.00485876 |
| IARS       | 39.855   | 25.7175   | 1.549722951 | 0.632010324 | 0.01646515 |
| LAP3       | 330.2    | 214.465   | 1.539645164 | 0.622597897 | 0.01472875 |
| UBE2L6     | 354.62   | 230.495   | 1.538514935 | 0.621538449 | 0.00364238 |
| PLD3       | 627.9825 | 411.175   | 1.527287651 | 0.610971807 | 0.01484993 |
| DTX3L      | 62.14    | 40.7975   | 1.523132545 | 0.607041492 | 0.01433418 |
| RNPEPL1    | 166.815  | 109.8025  | 1.519227704 | 0.603338119 | 0.01388568 |
| ACADVL     | 706.93   | 472.335   | 1.496670795 | 0.581756924 | 0.01478106 |
| FAM53B     | 44.97    | 30.1025   | 1.493895856 | 0.579079577 | 0.00962204 |
| APOL2      | 85.9625  | 57.6875   | 1.490140845 | 0.575448698 | 0.04406798 |
| NAP1L4     | 123.185  | 84.4375   | 1.458889711 | 0.544870823 | 0.0257546  |
| CAPZA1     | 145.2925 | 99.8975   | 1.454415776 | 0.540439754 | 0.04255287 |
| CDK5RAP3   | 579.575  | 400.3375  | 1.44771599  | 0.533778605 | 0.01094975 |
| PSMD6      | 66.09    | 46.29     | 1.427738172 | 0.513731433 | 0.01527164 |
| LTA4H      | 58.365   | 41.355    | 1.411316649 | 0.497041713 | 0.02796928 |

|         |          |          |             |             |            |
|---------|----------|----------|-------------|-------------|------------|
| RETREG2 | 72.77    | 52.345   | 1.390199637 | 0.475292073 | 0.04323823 |
| PHRF1   | 24.44    | 17.7     | 1.38079096  | 0.465494925 | 0.01513471 |
| RBM5    | 141.56   | 103.3975 | 1.369085326 | 0.453212363 | 0.03174175 |
| EIF3B   | 89.1825  | 66.03    | 1.350636075 | 0.433638996 | 0.04969659 |
| SEC13   | 127.2825 | 95.6975  | 1.330050419 | 0.411480936 | 0.03735926 |
| BCAP31  | 256.7825 | 194.7575 | 1.318472973 | 0.398867998 | 0.00145672 |
| PSME1   | 309.7375 | 235.5525 | 1.314940406 | 0.394997417 | 0.04674935 |
| PKM     | 518.7575 | 397.525  | 1.304968241 | 0.384014696 | 0.04718986 |
| GSN     | 393.395  | 309.14   | 1.272546419 | 0.347718283 | 0.0252138  |
| CREG1   | 414.175  | 327.3825 | 1.265110383 | 0.339263268 | 0.00436985 |
| LGMN    | 467.27   | 396.0875 | 1.179714078 | 0.238437243 | 0.02048691 |



**Supplemental table 4 HIV induced transcriptional changes evaluated at 8 months of age (hg19)- Downregulation.**

| Gene     | Expression levels, TPM |            | Fold change | Log2 fold change | p-value    |
|----------|------------------------|------------|-------------|------------------|------------|
|          | HIV+                   | Uninfected |             |                  |            |
| PSAP     | 2051.445               | 2395.52    | 0.856367302 | -0.223698383     | 0.04075024 |
| PFDN5    | 670.95                 | 809.8325   | 0.82850466  | -0.271418283     | 0.00714326 |
| FCER1G   | 1611.695               | 1971.515   | 0.81749061  | -0.290725935     | 0.0332362  |
| NANS     | 78.3275                | 97.7475    | 0.801324842 | -0.319540892     | 0.04997244 |
| RPS2     | 1271.8975              | 1601.1025  | 0.794388554 | -0.332083259     | 0.03186983 |
| RPS3     | 587.6775               | 741.025    | 0.793060288 | -0.334497552     | 0.04685608 |
| NCF4     | 225.88                 | 284.915    | 0.792797852 | -0.334975041     | 0.01165333 |
| MRFAP1   | 179.115                | 228.4925   | 0.783898815 | -0.35126065      | 0.04243293 |
| LHFPL2   | 100.9                  | 129.4675   | 0.779346168 | -0.359663812     | 0.00697366 |
| GPX4     | 429.0225               | 551.4675   | 0.777965157 | -0.362222553     | 0.03947836 |
| RACK1    | 687.215                | 884.2625   | 0.777161759 | -0.363713181     | 0.04615489 |
| CD276    | 130.9375               | 169.015    | 0.774709345 | -0.368272952     | 0.04857593 |
| ACTB     | 3507.84                | 4611.2675  | 0.760710586 | -0.394580414     | 0.00269018 |
| TGFB1    | 98.995                 | 131.4275   | 0.753228967 | -0.408839613     | 0.00583488 |
| ITGB2    | 542.995                | 723.2775   | 0.750742281 | -0.413610359     | 0.01801761 |
| AKR1A1   | 404.055                | 541.81     | 0.745750355 | -0.423235335     | 0.04698739 |
| SSR2     | 169.12                 | 226.9575   | 0.745161539 | -0.424374882     | 0.00757413 |
| OS9      | 311.3325               | 421.0575   | 0.739406138 | -0.435561075     | 0.03064039 |
| IL13RA1  | 117.3175               | 160.46     | 0.731132369 | -0.451795469     | 0.03783597 |
| PA2G4    | 37.65                  | 51.5075    | 0.73096151  | -0.452132653     | 0.04413321 |
| RPLP1    | 1079.5                 | 1497.9     | 0.720675613 | -0.472578069     | 0.03302154 |
| RPS29    | 2506.52                | 3484.2925  | 0.719377033 | -0.475179995     | 0.03706166 |
| ATF4     | 186.9375               | 260.5075   | 0.717589705 | -0.478768903     | 0.00620799 |
| HLA-DMA  | 772.2125               | 1082.985   | 0.713040809 | -0.487943448     | 0.00789469 |
| CD74     | 19736.6575             | 27696.205  | 0.712612342 | -0.488810625     | 0.01795829 |
| RPS10    | 563.38                 | 797.2425   | 0.706660771 | -0.500910272     | 0.0129883  |
| TMEM176B | 313.2175               | 445.18     | 0.703574958 | -0.507223959     | 0.04367624 |
| RPL23A   | 830.13                 | 1186.9775  | 0.699364563 | -0.5158834       | 0.00351166 |
| LRRFIP1  | 49.2475                | 70.4525    | 0.699017068 | -0.516600412     | 0.04928587 |
| RPL36A   | 301.6025               | 432.335    | 0.697612962 | -0.519501248     | 0.0429623  |
| SH3PXD2A | 4.8975                 | 7.0225     | 0.69740121  | -0.519939227     | 0.0225899  |
| IKZF1    | 37.9575                | 54.4625    | 0.696947441 | -0.520878233     | 0.03924119 |
| ZW10     | 7.655                  | 10.9875    | 0.696700796 | -0.521388883     | 0.0248265  |
| SERPINB6 | 198.98                 | 285.7525   | 0.696336865 | -0.522142691     | 0.00693775 |
| MFSD12   | 125.13                 | 179.7275   | 0.696220667 | -0.522383454     | 0.03647708 |
| RASSF1   | 75.645                 | 109.095    | 0.693386498 | -0.528268351     | 0.01651714 |

|          |           |           |             |              |            |
|----------|-----------|-----------|-------------|--------------|------------|
| MT-ND2   | 3838.21   | 5542.125  | 0.692552045 | -0.530005603 | 0.00298653 |
| RPS20    | 965.145   | 1400.245  | 0.689268664 | -0.536861667 | 0.00219552 |
| PBX2     | 44.6975   | 65.04     | 0.687230935 | -0.541133116 | 0.02060735 |
| MT-CO1   | 8192.345  | 11927.96  | 0.686818618 | -0.541998948 | 7.46E-05   |
| EPB41L2  | 156.81    | 228.33    | 0.68676915  | -0.542102861 | 0.04528479 |
| WASF2    | 53.43     | 77.9225   | 0.685681286 | -0.544389947 | 0.04578531 |
| RPL41    | 2564.2575 | 3761.4    | 0.681729542 | -0.552728592 | 0.00537304 |
| HMG2     | 266.7475  | 391.4875  | 0.681369137 | -0.553491494 | 0.04102571 |
| RPSA     | 574.0875  | 843.195   | 0.680847847 | -0.554595669 | 0.00613432 |
| STARD7   | 58.985    | 86.7175   | 0.680197192 | -0.555975045 | 0.04022418 |
| GRINA    | 173.935   | 256.7825  | 0.677363138 | -0.561998617 | 0.04818836 |
| RPLP2    | 816.3425  | 1206.0275 | 0.676885477 | -0.563016331 | 0.00056498 |
| MT-ND1   | 3181.665  | 4710.6075 | 0.675425622 | -0.566131187 | 0.00143875 |
| RPS18    | 830.52    | 1239.7975 | 0.66988359  | -0.578017684 | 0.01949816 |
| COTL1    | 633.8375  | 946.705   | 0.669519544 | -0.578801925 | 0.00022156 |
| RASSF2   | 41.29     | 61.6825   | 0.669395696 | -0.579068821 | 0.03586731 |
| CELF2    | 15.825    | 23.8075   | 0.6647065   | -0.589210633 | 0.00967623 |
| LPIN2    | 35.995    | 54.155    | 0.664666236 | -0.589298026 | 0.03751514 |
| ELOVL5   | 30.3175   | 45.6225   | 0.664529563 | -0.589594712 | 0.04846253 |
| EIF3H    | 86.16     | 129.795   | 0.663816018 | -0.591144654 | 0.04058342 |
| MT-ND5   | 1723.11   | 2597.125  | 0.663468258 | -0.591900649 | 0.01151547 |
| RPL13A   | 1647.2325 | 2483.615  | 0.663239874 | -0.59239735  | 0.00778706 |
| RUNX3    | 26.01     | 39.235    | 0.662928508 | -0.593074801 | 0.02206209 |
| ATXN7L3B | 18.025    | 27.2225   | 0.662136101 | -0.594800305 | 0.0401715  |
| RPS8     | 659.5125  | 997.5675  | 0.661120676 | -0.59701446  | 0.00572345 |
| RPLP0    | 626.7125  | 948.3975  | 0.660812054 | -0.597688091 | 0.00409875 |
| SLC30A1  | 9.5125    | 14.41     | 0.660131853 | -0.599173882 | 0.01855688 |
| NACA     | 781.59    | 1184.1525 | 0.660041675 | -0.599370975 | 0.00306942 |
| CYBRD1   | 14.3025   | 21.73     | 0.65819144  | -0.60342083  | 0.04272551 |
| RPL18    | 594.295   | 903.2725  | 0.657935451 | -0.603982044 | 0.00986875 |
| COPA     | 35.985    | 54.76     | 0.657140248 | -0.605726788 | 0.0476734  |
| SPATA20  | 120.02    | 183.11    | 0.655453006 | -0.609435747 | 0.02257996 |
| RNF166   | 163.145   | 250.4425  | 0.651426974 | -0.618324635 | 0.03197327 |
| RPL8     | 863.745   | 1326.7075 | 0.651044032 | -0.619172975 | 0.0134967  |
| MT-ATP6  | 7143.215  | 10975.81  | 0.650814382 | -0.619681963 | 0.00152545 |
| ZC3H3    | 9.8325    | 15.1925   | 0.647194339 | -0.627729106 | 0.04783406 |
| SRSF3    | 36.2825   | 56.1025   | 0.646718061 | -0.628791194 | 0.0196329  |
| TTC31    | 31.4625   | 48.6775   | 0.646345848 | -0.629621764 | 0.03738286 |
| EIF3F    | 136.585   | 211.37    | 0.646189147 | -0.629971575 | 0.04268818 |
| RPL12    | 678.74    | 1053.1425 | 0.644490181 | -0.633769717 | 0.03267661 |
| SAR1B    | 9.4575    | 14.7      | 0.643367347 | -0.636285379 | 0.03576995 |
| RPS16    | 871.4125  | 1359.8975 | 0.64079278  | -0.642070202 | 0.0024311  |

|          |           |           |             |              |            |
|----------|-----------|-----------|-------------|--------------|------------|
| RPL6     | 773.16    | 1208.2425 | 0.639904655 | -0.644071134 | 0.00795042 |
| RPL26    | 1717.0225 | 2690.3675 | 0.638211137 | -0.647894311 | 0.00120641 |
| NFATC2   | 17.6625   | 27.7225   | 0.637117865 | -0.650367804 | 0.01092985 |
| SLC25A6  | 203.4725  | 319.5     | 0.636846635 | -0.650982109 | 0.00422793 |
| CD46     | 47.3375   | 74.455    | 0.635786717 | -0.65338522  | 0.01000988 |
| MT-CO2   | 7045.5975 | 11092.525 | 0.635166249 | -0.65479384  | 0.00158884 |
| RPS7     | 365.52    | 576.1525  | 0.634415367 | -0.656500377 | 0.0335527  |
| RPL37A   | 829.9125  | 1312.0275 | 0.632542001 | -0.660766817 | 0.01100166 |
| PHC2     | 74.205    | 117.465   | 0.631720087 | -0.662642648 | 0.00015435 |
| MFSD1    | 146.635   | 232.185   | 0.631543812 | -0.663045273 | 0.04511541 |
| RPL27A   | 1018.37   | 1614.6525 | 0.630705368 | -0.664961882 | 0.01307422 |
| PRDX3    | 89.9475   | 142.615   | 0.630701539 | -0.664970641 | 0.01322307 |
| MANF     | 63.35     | 100.4725  | 0.630520789 | -0.665384156 | 0.03042545 |
| RPL21    | 1176.86   | 1868.9875 | 0.629677834 | -0.667314214 | 0.00188829 |
| RPL18A   | 636.7525  | 1012.2275 | 0.629060661 | -0.668728951 | 0.00302099 |
| C1orf162 | 212.6525  | 338.0825  | 0.628995881 | -0.668877525 | 0.02082969 |
| KLHL36   | 12.33     | 19.6175   | 0.628520454 | -0.6699684   | 0.01756588 |
| RPS11    | 1939.635  | 3100.1675 | 0.625654904 | -0.676560973 | 0.00130214 |
| FAU      | 427.8225  | 685.95    | 0.623693418 | -0.681091061 | 0.03009518 |
| MT-ND4L  | 4423.185  | 7120.5025 | 0.621190007 | -0.686893473 | 0.00128006 |
| AKAP17A  | 53.84     | 86.695    | 0.621027741 | -0.687270381 | 0.02920783 |
| RPL10A   | 408.4275  | 658.745   | 0.620008501 | -0.689640098 | 0.02142761 |
| TGOLN2   | 53.595    | 86.4725   | 0.61979242  | -0.690142985 | 0.03655799 |
| PTP4A2   | 34.25     | 55.4025   | 0.61820315  | -0.69384709  | 0.03903203 |
| COL8A2   | 15.4525   | 25.075    | 0.616251246 | -0.698409436 | 0.02947421 |
| MDH2     | 72.1125   | 117.02    | 0.616240814 | -0.69843386  | 0.0008415  |
| ATL3     | 8.805     | 14.335    | 0.614230903 | -0.703146995 | 0.03002856 |
| PYCARD   | 190.1225  | 309.64    | 0.614011433 | -0.703662577 | 0.04779365 |
| RPS23    | 1169.2025 | 1906.545  | 0.613257227 | -0.705435764 | 0.0110706  |
| RPL13    | 1406.7625 | 2294.485  | 0.613105991 | -0.705791593 | 0.00717492 |
| P4HA1    | 11.9      | 19.4225   | 0.612691466 | -0.706767338 | 0.04422268 |
| RPS12    | 508.4875  | 833.215   | 0.610271659 | -0.712476503 | 0.01140883 |
| MTATP6P1 | 736.0575  | 1206.9025 | 0.609873208 | -0.713418755 | 0.00910884 |
| TKT      | 94.09     | 154.4175  | 0.60932213  | -0.714722956 | 0.00996391 |
| RPS25    | 558.5925  | 918.5375  | 0.608132493 | -0.717542418 | 0.02496528 |
| LST1     | 491.975   | 811.1     | 0.606552829 | -0.721294788 | 0.04791303 |
| ZBTB38   | 4.3375    | 7.155     | 0.606219427 | -0.722088009 | 0.04479529 |
| MS4A6A   | 673.2725  | 1115.565  | 0.603526016 | -0.728512133 | 0.00609357 |
| C6orf48  | 131.3925  | 217.7875  | 0.603305975 | -0.729038225 | 0.04401576 |
| CSF2RB   | 20.78     | 34.4525   | 0.603149263 | -0.72941302  | 0.0443603  |
| RPS24    | 1650.9475 | 2746.4525 | 0.60111999  | -0.734275097 | 0.00210261 |
| TBRG1    | 39.89     | 66.7725   | 0.597401625 | -0.743226933 | 0.00884004 |

|          |           |           |             |              |            |
|----------|-----------|-----------|-------------|--------------|------------|
| HLA-DMB  | 678.9775  | 1141.875  | 0.594616311 | -0.749969057 | 0.00171658 |
| FYB1     | 51.335    | 86.65     | 0.592440854 | -0.755256964 | 0.01948229 |
| YWHAQ    | 30.895    | 52.2075   | 0.591773213 | -0.756883702 | 0.03983854 |
| CORO7    | 117.375   | 198.9175  | 0.590068747 | -0.761045047 | 0.0154039  |
| UBE3A    | 5.62      | 9.5425    | 0.588944197 | -0.763797151 | 0.0407029  |
| CERKL    | 15.9225   | 27.0575   | 0.588469001 | -0.764961675 | 0.02302372 |
| PSMG2    | 47.19     | 80.435    | 0.586684901 | -0.769342232 | 0.01965195 |
| ATP5F1   | 135.8425  | 231.6425  | 0.586431678 | -0.769965057 | 0.02469478 |
| RPL5     | 227.25    | 390.3825  | 0.582121381 | -0.780608087 | 0.02247044 |
| ANP32B   | 83.69     | 143.95    | 0.581382424 | -0.782440636 | 0.02452811 |
| RPL7A    | 702.2425  | 1209.4325 | 0.580638027 | -0.784289036 | 0.00075261 |
| MT-ND4   | 4721.1075 | 8135.99   | 0.580274496 | -0.785192572 | 0.00135799 |
| RPL10    | 1579.08   | 2724.815  | 0.579518243 | -0.787074019 | 0.00123491 |
| HAUS4    | 54.84     | 95.15     | 0.576353127 | -0.794975085 | 0.01713806 |
| RPS13    | 682.625   | 1184.845  | 0.576130211 | -0.795533183 | 0.02360328 |
| ATP5I    | 262.365   | 455.795   | 0.575620619 | -0.796809824 | 0.03544664 |
| BTA1F1   | 24.05     | 41.8225   | 0.575049316 | -0.79824241  | 0.01487377 |
| RPL30    | 192.01    | 334.3825  | 0.574222634 | -0.800317896 | 0.01832763 |
| LITAF    | 121.425   | 211.5825  | 0.573889618 | -0.801154821 | 0.04358381 |
| PAXX     | 99.4475   | 173.9125  | 0.571824912 | -0.806354622 | 0.00658694 |
| EIF3C    | 203.26    | 357.4     | 0.568718523 | -0.814213303 | 0.04856546 |
| DNAJC5   | 43.0325   | 75.71     | 0.568385946 | -0.815057211 | 0.03151467 |
| RPL23    | 492.9825  | 869.1325  | 0.567212134 | -0.8180397   | 0.00164015 |
| APMAP    | 62.0425   | 109.8375  | 0.564857175 | -0.824041968 | 0.00889463 |
| BHLHE41  | 109.295   | 193.9175  | 0.563615971 | -0.827215602 | 0.00975059 |
| MT-ND3   | 4613.8275 | 8202.19   | 0.562511658 | -0.830045097 | 0.00067486 |
| KIAA0141 | 92.925    | 165.4075  | 0.561794356 | -0.831885963 | 0.03736427 |
| SEC16A   | 44.8      | 79.7725   | 0.561597042 | -0.832392759 | 0.00108079 |
| KLHL5    | 21.75     | 38.805    | 0.560494782 | -0.835227154 | 0.0014683  |
| IRF5     | 132.695   | 236.76    | 0.560462071 | -0.835311351 | 0.02700433 |
| VPS29    | 123.8825  | 221.2275  | 0.559977851 | -0.83655833  | 0.01961567 |
| CCDC88A  | 16.595    | 29.6925   | 0.558895344 | -0.839349939 | 0.03488553 |
| SPAG7    | 34.425    | 61.7275   | 0.557693087 | -0.842456708 | 0.02339008 |
| SETX     | 33.3475   | 60.165    | 0.554267431 | -0.851345858 | 0.04566122 |
| SNHG12   | 70.4725   | 127.485   | 0.552790524 | -0.855195209 | 0.01524386 |
| APOL3    | 56.7275   | 103.1225  | 0.550098184 | -0.862238954 | 0.02690578 |
| ELOF1    | 23.655    | 43.025    | 0.54979663  | -0.863030031 | 0.03918347 |
| UBAC1    | 44.285    | 80.6675   | 0.548981932 | -0.865169427 | 0.02162475 |
| HLA-DOA  | 111.2775  | 202.895   | 0.548448705 | -0.8665714   | 0.00547023 |
| METTL17  | 90.4925   | 165.015   | 0.54838954  | -0.866727041 | 0.04935837 |
| RPL4     | 695.02    | 1267.5925 | 0.548299237 | -0.86696463  | 0.02999126 |
| RPL11    | 544.455   | 995.7075  | 0.546802148 | -0.870909184 | 0.00228628 |
| TMEM167A | 23.2475   | 42.755    | 0.543737575 | -0.879017567 | 0.02115864 |

|            |           |            |             |              |            |
|------------|-----------|------------|-------------|--------------|------------|
| RPS28      | 393.2425  | 723.2725   | 0.543698952 | -0.879120049 | 0.03693214 |
| TPT1       | 3860.32   | 7115.8525  | 0.542495787 | -0.882316162 | 1.10E-06   |
| HLA-DRB1   | 3243.2225 | 5978.9075  | 0.542444    | -0.882453888 | 0.02469749 |
| RPS9       | 667.195   | 1230.5775  | 0.542180399 | -0.883155137 | 0.00304167 |
| SEC11A     | 99.1475   | 183.225    | 0.541124301 | -0.885968064 | 0.03882605 |
| NUCKS1     | 16.0575   | 29.6925    | 0.54079313  | -0.886851272 | 0.045224   |
| MT-CO3     | 5552.0425 | 10279.1025 | 0.540129111 | -0.888623787 | 0.00014052 |
| CD93       | 30.51     | 56.505     | 0.539952217 | -0.889096354 | 0.01134515 |
| HLA-DRA    | 6031.9725 | 11190.0775 | 0.539046535 | -0.891518272 | 0.00537775 |
| EEF1A1     | 1291.7075 | 2403.25    | 0.537483616 | -0.895707317 | 0.00012428 |
| DRAM2      | 61.01     | 113.5425   | 0.537331836 | -0.896114777 | 0.03644861 |
| REX1BD     | 116.365   | 216.6075   | 0.537215932 | -0.896426004 | 0.03221315 |
| RPL7       | 606.945   | 1132.3475  | 0.536005952 | -0.899679073 | 0.00021332 |
| RPL3       | 852.7325  | 1591.24    | 0.53589182  | -0.8999863   | 0.00239998 |
| RPS6       | 733.7225  | 1369.3325  | 0.535824937 | -0.900166371 | 2.91E-05   |
| RPL22      | 306.1275  | 573.665    | 0.533634613 | -0.906075849 | 0.00876244 |
| AC004656.1 | 8.08      | 15.1525    | 0.533245339 | -0.907128644 | 0.03465173 |
| RPL27      | 447.7525  | 841.375    | 0.532167583 | -0.910047464 | 0.00392557 |
| ADGRG5     | 14.685    | 27.84      | 0.527478448 | -0.922815946 | 0.02686851 |
| ZWINT      | 18.525    | 35.33      | 0.524341919 | -0.931420207 | 0.03763294 |
| MT-ND6     | 2735.58   | 5225.5025  | 0.523505634 | -0.933723031 | 0.00038184 |
| SLC9A3R1   | 46.0025   | 87.875     | 0.523499289 | -0.933740518 | 0.02460085 |
| DDT        | 51.3725   | 98.355     | 0.522317117 | -0.937002113 | 0.00822523 |
| LAMTOR1    | 93.7      | 179.8025   | 0.521127348 | -0.940292127 | 0.02260386 |
| NDUFB1     | 181.315   | 349.675    | 0.518524344 | -0.947516372 | 0.04585752 |
| HLA-DQB1   | 1262.27   | 2465.4725  | 0.511978941 | -0.965843625 | 0.02005358 |
| RPL37      | 463.9375  | 906.415    | 0.511837845 | -0.966241272 | 0.00074797 |
| SLC2A5     | 99.0175   | 193.68     | 0.511242772 | -0.967919555 | 0.00755285 |
| LAMTOR5    | 50.0175   | 98.335     | 0.508643921 | -0.975272051 | 0.04613596 |
| HLA-DPB1   | 1931.8275 | 3811.3675  | 0.506859415 | -0.980342446 | 0.00302821 |
| MBD6       | 20.285    | 40.0875    | 0.506018085 | -0.982739146 | 0.01971744 |
| KRI1       | 27.9125   | 55.205     | 0.505615433 | -0.983887594 | 0.04188474 |
| SACM1L     | 18.1675   | 36.17      | 0.502280896 | -0.993433692 | 0.03188857 |
| NAGPA      | 23.305    | 46.8875    | 0.497040789 | -1.008563845 | 0.01562029 |
| AMACR      | 21.045    | 42.35      | 0.496930342 | -1.00888446  | 0.04311884 |
| SLC7A8     | 23.23     | 46.82      | 0.496155489 | -1.01113578  | 0.02059552 |
| MEFV       | 5.2925    | 10.675     | 0.495784543 | -1.012214801 | 0.04140583 |
| ZNF589     | 14.72     | 29.7025    | 0.49558118  | -1.012806693 | 0.02190804 |
| RPL34      | 421.835   | 851.6675   | 0.495304799 | -1.013611495 | 0.00023694 |
| MSL1       | 24.3325   | 49.7575    | 0.489021756 | -1.032029446 | 0.00546639 |
| ANKZF1     | 39.22     | 81.37      | 0.481995822 | -1.052907455 | 0.0277992  |
| SCML1      | 9.71      | 20.18      | 0.481169475 | -1.055382974 | 0.04574849 |
| ECSIT      | 19.465    | 40.56      | 0.479906312 | -1.059175308 | 0.0455406  |

|           |           |           |             |              |            |
|-----------|-----------|-----------|-------------|--------------|------------|
| EPM2AIP1  | 3.99      | 8.3875    | 0.475707899 | -1.071852115 | 0.0421454  |
| KRCC1     | 20.21     | 42.61     | 0.474301807 | -1.07612273  | 0.01547251 |
| EEF1G     | 393.745   | 831.4225  | 0.473579919 | -1.078320187 | 0.00043153 |
| SIRPB2    | 27.29     | 57.6375   | 0.473476469 | -1.078635366 | 0.03319723 |
| COX15     | 17.4875   | 37.09     | 0.471488272 | -1.08470621  | 0.03149857 |
| CCDC84    | 40.2475   | 85.8875   | 0.46860719  | -1.093549006 | 0.0182045  |
| ZFAND2A   | 17.5725   | 37.5775   | 0.467633557 | -1.096549634 | 0.04118077 |
| RPS26     | 432.7725  | 932.71    | 0.463994704 | -1.107819757 | 0.03100607 |
| EBI3      | 59.735    | 128.75    | 0.463961165 | -1.107924042 | 0.01010638 |
| ZC3H4     | 8.37      | 18.0675   | 0.463262765 | -1.110097366 | 0.04219684 |
| BIN1      | 327.8025  | 712.31    | 0.460196403 | -1.119678387 | 0.01061013 |
| ZDHHC6    | 46.7525   | 101.635   | 0.460003936 | -1.12028189  | 0.03579945 |
| ZNF512B   | 6.415     | 14.0675   | 0.456015639 | -1.132844793 | 0.04152823 |
| E4F1      | 12.205    | 26.7775   | 0.45579311  | -1.133548979 | 0.03936372 |
| ARL16     | 20.7      | 45.455    | 0.455395446 | -1.13480823  | 0.02213471 |
| NNT       | 22.1825   | 48.8      | 0.454559426 | -1.137459179 | 0.03813349 |
| SYF2      | 36.6225   | 80.5975   | 0.454387543 | -1.138004811 | 0.04216241 |
| PRAM1     | 56.25     | 123.8825  | 0.45405929  | -1.139047401 | 0.04550551 |
| NAP1L1    | 91.7025   | 202.4075  | 0.453058805 | -1.142229778 | 0.02264612 |
| IL12RB1   | 23.0225   | 50.8975   | 0.452330665 | -1.144550292 | 0.0286918  |
| RPS3A     | 491.81    | 1087.745  | 0.45213722  | -1.145167411 | 0.00037295 |
| RPL35A    | 224.01    | 496.23    | 0.451423735 | -1.14744582  | 0.00977769 |
| CDK19     | 6.575     | 14.6375   | 0.449188728 | -1.154606371 | 0.03679414 |
| C5AR2     | 11.3325   | 25.275    | 0.448367953 | -1.157244931 | 0.03941235 |
| RPS27A    | 367.97    | 825.0825  | 0.445979644 | -1.164950231 | 0.00012699 |
| GUSBP11   | 35.93     | 81.4175   | 0.441305616 | -1.180149988 | 0.0419878  |
| NUBP2     | 34.3475   | 77.87     | 0.44108771  | -1.180862531 | 0.04593083 |
| NUSAP1    | 16.5725   | 37.575    | 0.441051231 | -1.180981851 | 0.00196785 |
| VPS52     | 38.87     | 88.275    | 0.440328519 | -1.183347808 | 0.00674394 |
| ZNF224    | 24.7825   | 56.545    | 0.438279247 | -1.190077729 | 0.04959686 |
| JMJD1C    | 19.1275   | 43.7875   | 0.436825578 | -1.19487076  | 0.02626707 |
| RNF187    | 85.1      | 194.8775  | 0.436684584 | -1.195336494 | 0.02464489 |
| GMEB2     | 3.6625    | 8.4225    | 0.434847136 | -1.201419764 | 0.04781202 |
| TFEC      | 25.385    | 58.47     | 0.434154267 | -1.203720331 | 0.04069318 |
| CLDND1    | 30.3225   | 69.9125   | 0.433720722 | -1.205161721 | 0.02890583 |
| FDX1      | 6.6425    | 15.3275   | 0.433371391 | -1.206324177 | 0.03244448 |
| POLG      | 37.95     | 87.615    | 0.433145009 | -1.207078    | 0.03983547 |
| LSM7      | 60.9725   | 141.245   | 0.431678997 | -1.211969192 | 0.0496124  |
| NABP1     | 55.95     | 130.8325  | 0.427646036 | -1.225510928 | 0.00412258 |
| MT-CYB    | 2042.5775 | 4793.1575 | 0.426144457 | -1.230585528 | 7.39E-05   |
| PCBP1-AS1 | 16.2425   | 38.1525   | 0.425725706 | -1.23200389  | 0.03641419 |
| SMAD4     | 16.3      | 38.5025   | 0.423349133 | -1.24008016  | 0.01256025 |
| ZNF18     | 12.5075   | 29.5725   | 0.422943613 | -1.241462759 | 0.02570307 |

|             |           |           |             |              |            |
|-------------|-----------|-----------|-------------|--------------|------------|
| MTND2P28    | 54.7125   | 129.395   | 0.422833185 | -1.241839487 | 0.00450842 |
| RPL31       | 389.195   | 920.6725  | 0.422729038 | -1.242194879 | 0.00217877 |
| CXCL9       | 28.215    | 67.2075   | 0.419819217 | -1.25215989  | 0.02618355 |
| RPL9        | 331.57    | 797.015   | 0.416014755 | -1.265293397 | 9.76E-05   |
| TCAF1       | 4.5175    | 11.005    | 0.410495229 | -1.284562639 | 0.03682035 |
| HIRIP3      | 8.0775    | 19.7275   | 0.409453808 | -1.288227389 | 0.02964328 |
| RPL24       | 153.5275  | 377.1225  | 0.407102467 | -1.296536132 | 0.04636483 |
| ILVBL       | 21.875    | 53.7525   | 0.406957816 | -1.297048838 | 0.04441566 |
| DCP2        | 11.9475   | 29.39     | 0.406515822 | -1.298616591 | 0.04941693 |
| CASP4       | 86.0125   | 212.845   | 0.404108624 | -1.307184956 | 0.00977747 |
| ZNF736      | 3.43      | 8.49      | 0.404004711 | -1.307555977 | 0.04325665 |
| CTBP1-AS2   | 6.2       | 15.4375   | 0.401619433 | -1.316099016 | 0.00853592 |
| DUSP12      | 11.3675   | 28.3125   | 0.401501104 | -1.316524141 | 0.01624553 |
| RRP36       | 23.1775   | 58.015    | 0.399508748 | -1.323701002 | 0.00389919 |
| MRPL53      | 63.6825   | 159.835   | 0.398426502 | -1.32761448  | 0.01562935 |
| EEF1A1P5    | 27.8475   | 69.9025   | 0.39837631  | -1.327796237 | 0.01911647 |
| 8-Mar       | 5.015     | 12.6      | 0.398015873 | -1.329102128 | 0.04464444 |
| VNN1        | 2.835     | 7.135     | 0.397337071 | -1.331564695 | 0.01987798 |
| DEAF1       | 21.1775   | 53.3475   | 0.396972679 | -1.332888375 | 0.01342542 |
| MED1        | 4.5575    | 11.5075   | 0.396046057 | -1.336259881 | 0.00676781 |
| TOMM22      | 16.22     | 40.99     | 0.39570627  | -1.33749817  | 0.03148414 |
| LRRC75A-AS1 | 136.515   | 345.155   | 0.395517956 | -1.338184903 | 0.00435596 |
| HLA-DRB5    | 1213.0225 | 3070.2825 | 0.39508498  | -1.339765095 | 0.01466187 |
| GNPTAB      | 11.8975   | 30.2975   | 0.392689166 | -1.3485403   | 0.00170073 |
| EAF1        | 3.52      | 8.99      | 0.391546162 | -1.352745687 | 0.0280705  |
| VARS        | 36.0925   | 93.23     | 0.38713397  | -1.36909519  | 0.01515095 |
| SLC46A1     | 12.1475   | 31.4375   | 0.38640159  | -1.371827062 | 0.04368972 |
| CCS         | 43.2075   | 111.9925  | 0.385807085 | -1.374048456 | 0.01126395 |
| TTL         | 11.2625   | 29.1925   | 0.385801148 | -1.37407066  | 0.0364527  |
| RAB12       | 24.1575   | 62.8075   | 0.384627632 | -1.378465684 | 0.03630921 |
| ALG3        | 22.6975   | 59.255    | 0.383047844 | -1.384403494 | 0.04384799 |
| NDUFAF3     | 46.535    | 121.58    | 0.382752097 | -1.385517812 | 0.01036286 |
| PHYH        | 5.8975    | 15.455    | 0.381591718 | -1.389898236 | 0.04722963 |
| GLA         | 43.0825   | 113.185   | 0.380637894 | -1.393508901 | 0.04812377 |
| TRO         | 19.02     | 50.2525   | 0.378488632 | -1.401678124 | 0.02688522 |
| SIRT1       | 5.8625    | 15.5725   | 0.376464922 | -1.40941265  | 0.00637475 |
| NAA25       | 4.225     | 11.25     | 0.375555556 | -1.412901755 | 0.02469053 |
| DISP1       | 9.265     | 24.685    | 0.375329147 | -1.413771764 | 0.01989988 |
| PHF10       | 5.9075    | 15.94     | 0.370608532 | -1.432032    | 0.01826552 |
| NOL8        | 19.3775   | 52.385    | 0.369905507 | -1.434771315 | 0.00194472 |
| ZNF304      | 3.5925    | 9.7375    | 0.368934531 | -1.438563266 | 0.0108217  |
| EIF3L       | 156.61    | 426.4075  | 0.36727778  | -1.445056478 | 0.01536216 |
| FEM1B       | 5.0475    | 13.81     | 0.365496017 | -1.452072409 | 0.01695678 |

|            |         |          |             |              |            |
|------------|---------|----------|-------------|--------------|------------|
| PIAS3      | 8.175   | 22.5425  | 0.362648331 | -1.463356886 | 0.01969118 |
| MRE11      | 4.9225  | 13.6025  | 0.361882007 | -1.466408717 | 0.04901018 |
| WDR24      | 6.84    | 19.11    | 0.357927786 | -1.482259548 | 0.016745   |
| CD209      | 10.92   | 30.545   | 0.35750532  | -1.483963384 | 0.01954888 |
| PCGF3      | 24.835  | 69.6225  | 0.356709397 | -1.487178872 | 0.01490372 |
| ZNF75D     | 5.935   | 16.83    | 0.352644088 | -1.503715242 | 0.02703161 |
| HIPK3      | 3.9375  | 11.2525  | 0.34992224  | -1.514893736 | 0.02453928 |
| ZNF211     | 10.29   | 29.41    | 0.349880993 | -1.515063802 | 0.03467689 |
| IFT80      | 10.02   | 28.6425  | 0.349829798 | -1.515274912 | 0.00343472 |
| VPS13A     | 5.7525  | 16.585   | 0.346849563 | -1.527618029 | 0.03166918 |
| FAM89B     | 18.57   | 53.77    | 0.345359866 | -1.533827656 | 0.01840948 |
| OPRL1      | 6.1525  | 18.09    | 0.34010503  | -1.55594775  | 0.00925951 |
| MFF        | 34.085  | 100.68   | 0.338547874 | -1.562568233 | 0.0157299  |
| ADAMDEC1   | 46.5675 | 137.9825 | 0.33748845  | -1.567089967 | 0.00615383 |
| HLA-DQA1   | 645.895 | 1916.17  | 0.337076042 | -1.568854004 | 0.00666447 |
| KDM3A      | 9.9475  | 29.5425  | 0.336718287 | -1.570386019 | 0.02642738 |
| TBC1D8     | 8.6675  | 25.825   | 0.335624395 | -1.575080513 | 0.0340004  |
| KCNMB1     | 3.87    | 11.575   | 0.334341253 | -1.580606722 | 0.01126607 |
| VPS37B     | 7.9425  | 23.9325  | 0.331870887 | -1.591306019 | 0.00400105 |
| AKAP1      | 9.265   | 28.1425  | 0.329217376 | -1.602887613 | 0.01043133 |
| MSI2       | 3.5975  | 10.95    | 0.328538813 | -1.605864278 | 0.02814228 |
| AL135999.1 | 7.0425  | 21.4475  | 0.328359949 | -1.606649928 | 0.03481437 |
| UHRF2      | 8.02    | 24.4475  | 0.328049903 | -1.608012801 | 0.02042237 |
| RAPGEF2    | 8.3425  | 25.5175  | 0.326932497 | -1.612935306 | 0.03316493 |
| UBN1       | 12.3875 | 37.9525  | 0.326394836 | -1.615309864 | 0.03195514 |
| TPM1       | 11.8825 | 36.495   | 0.325592547 | -1.618860419 | 0.04569269 |
| VPS25      | 10.94   | 33.83    | 0.323381614 | -1.628690439 | 0.02018335 |
| CD5        | 6.8675  | 21.375   | 0.32128655  | -1.63806751  | 0.0378127  |
| LIN7C      | 2.355   | 7.4825   | 0.31473438  | -1.667793314 | 0.03882907 |
| ZFP14      | 1.86    | 5.91     | 0.314720812 | -1.667855509 | 0.0484938  |
| GART       | 12.96   | 41.5175  | 0.312157524 | -1.679653855 | 0.00943632 |
| PATZ1      | 7.59    | 24.895   | 0.304880498 | -1.713684225 | 0.02507117 |
| RDH10      | 1.0825  | 3.5525   | 0.304714989 | -1.714467625 | 0.03598957 |
| AC108488.1 | 5.46    | 17.95    | 0.304178273 | -1.717010988 | 0.03979518 |
| TLR8       | 1.9575  | 6.4475   | 0.303606049 | -1.71972756  | 0.03110817 |
| PDPR       | 6.745   | 22.24    | 0.303282374 | -1.72126644  | 0.00878122 |
| GPANK1     | 7.5625  | 25.04    | 0.302016773 | -1.72729942  | 0.03193143 |
| SLC35F6    | 6.825   | 22.69    | 0.300793301 | -1.733155658 | 0.03575491 |
| PWAR6      | 0.9225  | 3.0725   | 0.300244101 | -1.735792194 | 0.01444984 |
| SLAMF8     | 32.185  | 109.015  | 0.295234601 | -1.760066283 | 0.0108246  |
| ADAT1      | 8.4275  | 28.55    | 0.295183888 | -1.760314118 | 0.01387202 |
| KIAA0556   | 4.165   | 14.185   | 0.293620021 | -1.76797775  | 0.04045875 |
| SUPT3H     | 4.28    | 14.74    | 0.29036635  | -1.784053823 | 0.04979595 |



|          |         |          |             |              |            |
|----------|---------|----------|-------------|--------------|------------|
| PLCB3    | 12.2725 | 42.6875  | 0.28749634  | -1.798384507 | 0.03695294 |
| DENND4C  | 4.56    | 15.995   | 0.28508909  | -1.810515263 | 0.02684437 |
| TRPV4    | 4.295   | 15.1075  | 0.28429588  | -1.814534906 | 0.02244899 |
| ASL      | 13.67   | 48.47    | 0.282030122 | -1.82607884  | 0.03795254 |
| RAE1     | 6.63    | 23.51    | 0.282007656 | -1.826193764 | 0.00182836 |
| PRPF39   | 4.6925  | 16.7     | 0.280988024 | -1.831419453 | 0.02695933 |
| SNIP1    | 2.3575  | 8.41     | 0.280321046 | -1.83484803  | 0.00084664 |
| NDRG2    | 44.44   | 159.0825 | 0.279351909 | -1.839844418 | 0.00112143 |
| UBA5     | 10.8275 | 38.76    | 0.279347265 | -1.839868398 | 0.03311162 |
| PPIAP22  | 9.93    | 35.7325  | 0.277898272 | -1.847371232 | 0.03360568 |
| IL7R     | 3.1475  | 11.3825  | 0.276520975 | -1.854539176 | 0.04626773 |
| ABCA11P  | 3.525   | 12.8175  | 0.275014628 | -1.862419735 | 0.04673053 |
| POGLUT1  | 4.9075  | 17.9025  | 0.274123726 | -1.867100894 | 0.01137295 |
| GPALPP1  | 4.38    | 16.0375  | 0.273109899 | -1.87244649  | 0.0155184  |
| SPATA7   | 3.98    | 14.6625  | 0.27144075  | -1.881290772 | 0.02955662 |
| SAP130   | 2.5225  | 9.3375   | 0.270147256 | -1.888182069 | 0.04200161 |
| ZNF226   | 10.085  | 37.35    | 0.270013387 | -1.888897159 | 0.01496245 |
| ARMCX5   | 3.515   | 13.1425  | 0.26745292  | -1.90264314  | 0.0160017  |
| RNF138   | 5.7575  | 21.7025  | 0.265292017 | -1.914346831 | 0.03838238 |
| SYT17    | 7.595   | 28.64    | 0.265188547 | -1.914909623 | 0.02309671 |
| PMPCB    | 12.4375 | 47.155   | 0.26375782  | -1.922714227 | 0.00839446 |
| KLF9     | 1.25    | 4.78     | 0.261506276 | -1.935082523 | 0.01681469 |
| FAM13A   | 11.3425 | 44.6875  | 0.253818182 | -1.978132677 | 0.02511744 |
| ZBTB14   | 4.8475  | 19.2625  | 0.25165477  | -1.990482153 | 0.03346694 |
| QSOX2    | 2.8075  | 11.175   | 0.251230425 | -1.992916904 | 0.03012847 |
| SCMH1    | 4.8325  | 19.4375  | 0.248617363 | -2.008001038 | 0.01168111 |
| FCHO2    | 6.8225  | 27.445   | 0.248588085 | -2.008170945 | 0.0468389  |
| AFDN     | 6.515   | 26.2825  | 0.247883573 | -2.012265428 | 0.02881652 |
| ZNF236   | 2.925   | 11.805   | 0.247776366 | -2.012889512 | 0.021364   |
| FAM84B   | 1.885   | 7.6475   | 0.24648578  | -2.020423678 | 0.03723314 |
| MLLT10   | 4.075   | 16.795   | 0.242631736 | -2.043159831 | 0.03026458 |
| DDX12P   | 2.755   | 11.3925  | 0.241825763 | -2.047960147 | 0.01313628 |
| PGBD2    | 2.545   | 10.8025  | 0.235593613 | -2.08562767  | 0.01213717 |
| FLVCR2   | 7.8825  | 33.7     | 0.233902077 | -2.096023421 | 0.03146415 |
| ANKRD36B | 2.7     | 11.56    | 0.233564014 | -2.098110085 | 0.00606973 |
| ZNF331   | 4.74    | 20.4925  | 0.231304136 | -2.112137034 | 0.03155124 |
| AK1      | 21.4325 | 92.71    | 0.231177866 | -2.112924818 | 0.02986502 |
| GAREM1   | 1.21    | 5.3      | 0.228301887 | -2.130985312 | 0.01477019 |
| PQLC2    | 7.74    | 34.315   | 0.225557336 | -2.148433883 | 0.02432552 |
| TTC39C   | 6.9225  | 30.83    | 0.224537788 | -2.154969836 | 0.02894402 |
| RPL9P9   | 22.7525 | 101.7875 | 0.223529412 | -2.161463423 | 0.0197795  |
| RAB3D    | 1.2175  | 5.56     | 0.21897482  | -2.191163111 | 0.03127605 |
| CNTLN    | 1.1725  | 5.355    | 0.218954248 | -2.191298652 | 0.02306869 |

|            |         |          |             |              |            |
|------------|---------|----------|-------------|--------------|------------|
| AAMDC      | 9.5575  | 43.6825  | 0.218794712 | -2.192350226 | 0.01482666 |
| AL732372.3 | 6.985   | 32.425   | 0.2154202   | -2.214774554 | 0.02193308 |
| EXD2       | 3.065   | 14.245   | 0.215163215 | -2.216496643 | 0.04858144 |
| DLG1       | 4       | 18.6425  | 0.214563497 | -2.220523436 | 0.03423528 |
| EPC2       | 2.395   | 11.175   | 0.214317673 | -2.22217727  | 0.04272618 |
| MYL6B      | 15.7625 | 74.6925  | 0.211031897 | -2.244467016 | 0.02114829 |
| SAP30L     | 11.525  | 54.885   | 0.209984513 | -2.251645166 | 0.03587317 |
| RNLS       | 3.825   | 18.3925  | 0.207965203 | -2.265585938 | 0.00081261 |
| AL162586.1 | 6.6325  | 32.255   | 0.205627035 | -2.281898141 | 0.03261863 |
| GFER       | 9.15    | 44.6525  | 0.204915738 | -2.286897303 | 0.04484157 |
| ENOSF1     | 18.8075 | 92.575   | 0.2031596   | -2.299314554 | 0.00593047 |
| FMO5       | 2.2425  | 11.2     | 0.200223214 | -2.320318842 | 0.04103743 |
| PIWIL4     | 4.2025  | 21.0325  | 0.199809818 | -2.32330062  | 0.0100289  |
| ZNF100     | 1.34    | 6.8625   | 0.195264117 | -2.356501243 | 0.02298093 |
| UXT        | 14.955  | 76.8325  | 0.194644194 | -2.361088787 | 0.01414663 |
| TMEM223    | 4.0825  | 21.0775  | 0.193689954 | -2.368178968 | 0.02731805 |
| UNC119B    | 2.4925  | 12.8825  | 0.193479526 | -2.369747183 | 0.02609711 |
| CLP1       | 2.7875  | 14.77    | 0.18872715  | -2.405626116 | 0.0010319  |
| ZNF7       | 7.815   | 41.7725  | 0.187084805 | -2.41823571  | 0.0011651  |
| PPFIA4     | 2.805   | 15.0525  | 0.186347783 | -2.423930441 | 0.04359453 |
| ELMOD2     | 3.855   | 20.785   | 0.185470291 | -2.430739983 | 0.01370101 |
| GON7       | 6.355   | 34.41    | 0.184684685 | -2.436863862 | 0.04350399 |
| KLHL26     | 1.355   | 7.35     | 0.184353741 | -2.439451398 | 0.04252214 |
| SF3A2      | 16.21   | 93.72    | 0.172962015 | -2.531472863 | 0.00664108 |
| C19orf25   | 7.07    | 41.89    | 0.168775364 | -2.566823764 | 0.0227355  |
| ZNF528     | 4.1975  | 25.0725  | 0.167414498 | -2.578503625 | 0.04642038 |
| KCTD21     | 1.1975  | 7.2775   | 0.164548265 | -2.603417278 | 0.03395731 |
| LDHD       | 4.625   | 29.445   | 0.157072508 | -2.670497403 | 0.0289778  |
| UPK3BL1    | 19.555  | 127.3725 | 0.153526075 | -2.703444389 | 0.0068206  |
| CSNK1A1    | 5.1825  | 34.185   | 0.15160158  | -2.721643309 | 0.01392632 |
| IL10       | 4.185   | 28.63    | 0.146175341 | -2.774228142 | 0.01159677 |
| ISCA1      | 5.7775  | 40.605   | 0.142285433 | -2.813140128 | 0.0017808  |
| PDE6B      | 3.435   | 24.4075  | 0.14073543  | -2.828942527 | 0.01163976 |
| RHOBTB1    | 3.005   | 21.7075  | 0.138431418 | -2.852756688 | 0.0047713  |
| PHF6       | 0.9625  | 6.9675   | 0.138141371 | -2.855782652 | 0.00286195 |
| ZNF71      | 1.5525  | 11.5125  | 0.13485342  | -2.890535983 | 0.01463618 |
| ZNF223     | 1.8175  | 14.2475  | 0.12756624  | -2.970681523 | 0.01642124 |
| RABL2A     | 2.5425  | 20.105   | 0.126461079 | -2.983234657 | 0.04339063 |
| TFAP4      | 2.2775  | 22.7925  | 0.09992322  | -3.323036216 | 0.001432   |
| HLA-DRB6   | 11.33   | 116.3875 | 0.097347224 | -3.360716355 | 3.58E-05   |
| DNLZ       | 3.125   | 35.825   | 0.087229588 | -3.51903861  | 0.00491926 |
| CHRFAM7A   | 1.955   | 24.1775  | 0.080860304 | -3.628424562 | 0.03625006 |
| MTA3       | 1.1525  | 14.495   | 0.079510176 | -3.652716678 | 0.00788376 |

|           |        |         |             |              |            |
|-----------|--------|---------|-------------|--------------|------------|
| IL1RAP    | 0.9475 | 12.58   | 0.075317965 | -3.730862169 | 0.01423708 |
| SCAPER    | 0.955  | 14.0875 | 0.067790594 | -3.882771067 | 0.01225635 |
| HDAC9     | 1.9975 | 41.19   | 0.04849478  | -4.366026718 | 0.01406397 |
| LINC00909 | 1.2425 | 40.49   | 0.030686589 | -5.026247886 | 0.00697624 |
| SH3BP5    | 0.1525 | 8.06    | 0.018920596 | -5.723898691 | 0.03634056 |
